# Supplementary material for: Prevalence of and mothers’ knowledge, attitude and practice towards glucose-6-phosphate dehydrogenase deficiency among neonates with jaundice: a cross-sectional study
Source: PubMed Central journal article supplement — BMJ Open. 2020 Feb 25;10(2):e034079. doi: 10.1136/bmjopen-2019-034079 (PMC7045182; doi:10.1136/bmjopen-2019-034079), 2020-02-25
Supplement: bmjopen-2019-034079.draft_revisions.pdf [file bmjopen-2019-034079.draft_revisions.pdf]

# BMJ Open

BMJ Open is committed to open peer review. As part of this commitment we make the peer review history of every article we publish publicly available.

When an article is published we post the peer reviewers' comments and the authors' responses online. We also post the versions of the paper that were used during peer review. These are the versions that the peer review comments apply to.

The versions of the paper that follow are the versions that were submitted during the peer review process. They are not the versions of record or the final published versions. They should not be cited or distributed as the published version of this manuscript.

BMJ Open is an open access journal and the full, final, typeset and author-corrected version of record of the manuscript is available on our site with no access controls, subscription charges or pay-per-view fees (<http://bmjopen.bmj.com>).

If you have any questions on BMJ Open's open peer review process please email [info.bmjopen@bmj.com](mailto:info.bmjopen@bmj.com)

# BMJ Open

## Prevalence and Mothers' Perception of Glucose-6-Phosphate Dehydrogenase Deficiency among Egyptian Jaundiced Neonates

|                               |                                                                                                                                                                                                                                                                                                                                        |
|-------------------------------|----------------------------------------------------------------------------------------------------------------------------------------------------------------------------------------------------------------------------------------------------------------------------------------------------------------------------------------|
| Journal:                      | <i>BMJ Open</i>                                                                                                                                                                                                                                                                                                                        |
| Manuscript ID                 | bmjopen-2019-034079                                                                                                                                                                                                                                                                                                                    |
| Article Type:                 | Original research                                                                                                                                                                                                                                                                                                                      |
| Date Submitted by the Author: | 06-Sep-2019                                                                                                                                                                                                                                                                                                                            |
| Complete List of Authors:     | Kasemy, Zeinab; Public Health and Community Medicine; Menoufia University Faculty of Medicine, Public Health and Community Medicine Alkalash, Safa; Menoufia University Faculty of Medicine Bahbah, Wael; Menoufia University Faculty of Medicine, Pediatrics El Hefnawy, Sally; Menoufia University Faculty of Medicine, Biochemistry |
| Keywords:                     | Epidemiology < TROPICAL MEDICINE, Public health < INFECTIOUS DISEASES, Community child health < PAEDIATRICS, Family medicine, G6PD                                                                                                                                                                                                     |
|                               |                                                                                                                                                                                                                                                                                                                                        |

SCHOLARONE™  
Manuscripts

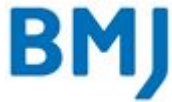

I, the Submitting Author has the right to grant and does grant on behalf of all authors of the Work (as defined in the below author licence), an exclusive licence and/or a non-exclusive licence for contributions from authors who are: i) UK Crown employees; ii) where BMJ has agreed a CC-BY licence shall apply, and/or iii) in accordance with the terms applicable for US Federal Government officers or employees acting as part of their official duties; on a worldwide, perpetual, irrevocable, royalty-free basis to BMJ Publishing Group Ltd ("BMJ") its licensees and where the relevant Journal is co-owned by BMJ to the co-owners of the Journal, to publish the Work in this journal and any other BMJ products and to exploit all rights, as set out in our [licence](#).

The Submitting Author accepts and understands that any supply made under these terms is made by BMJ to the Submitting Author unless you are acting as an employee on behalf of your employer or a postgraduate student of an affiliated institution which is paying any applicable article publishing charge ("APC") for Open Access articles. Where the Submitting Author wishes to make the Work available on an Open Access basis (and intends to pay the relevant APC), the terms of reuse of such Open Access shall be governed by a Creative Commons licence – details of these licences and which [Creative Commons](#) licence will apply to this Work are set out in our licence referred to above.

Other than as permitted in any relevant BMJ Author's Self Archiving Policies, I confirm this Work has not been accepted for publication elsewhere, is not being considered for publication elsewhere and does not duplicate material already published. I confirm all authors consent to publication of this Work and authorise the granting of this licence.

# Prevalence and Mothers' Perception of Glucose-6-Phosphate Dehydrogenase Deficiency among Egyptian Jaundiced Neonates

Running title: G6PD deficiency among Jaundiced Neonates

Zeinab A. Kasemy<sup>1</sup>, Safa H. Al Kalash<sup>2</sup>, Wael A. Bahbah<sup>3</sup> Sally M. El Hefnawy<sup>4</sup>

<sup>1</sup>Public health and community medicine department, Menoufia faculty of medicine, Egypt

<sup>2</sup>Family medicine department, Menoufia faculty of medicine, Egypt

<sup>3</sup>Pediatrics department, Menoufia faculty of medicine, Egypt

<sup>4</sup>Biochemistry department, Menoufia faculty of medicine, Egypt

Corresponding author:

Zeinab Abdel Aziz Kasemy

**Tel: +201068787807**

**Address: Gamal Abdel Nasser st, 5th floor, public health department, Faculty of medicine, Shibin ELkom, Menoufia, Egypt**

**E.mail: [zeinabkasemy@yahoo.com](mailto:zeinabkasemy@yahoo.com) , [zeinabkasemy@gmail.com](mailto:zeinabkasemy@gmail.com) , [zeinab.kasemy@med.menofia.edu.eg](mailto:zeinab.kasemy@med.menofia.edu.eg)**

**Funding: No fund**

**No conflict of interest**

**Contributor-ship statement:** All persons who meet authorship criteria are listed as authors, and all authors certify that they have participated sufficiently in the work to take public responsibility for the content, including participation in the concept, design, analysis, writing, or revision of the manuscript. Zeinab A. Kasemy has the role of getting the idea, performing statistical analysis, writing the methodology and results sections, final revision and publishing. Safa H. Al Kalash, family physician, has the role of writing the manuscript and revision. Wael A. Bahbah, the pediatrician, received, diagnosed and collected the data. Sally M. El Hefnawy had performed lab investigations. The entire team arranged a health education session to provide explanation about both diseases in all matters.

**Abstract:**

**Objectives:** To estimate the prevalence of Glucose 6 phosphate dehydrogenase (G6PD) deficiency among Egyptian jaundiced neonates and assessing the mothers' perception towards G6PD and Neonatal jaundice (NNJ).

**Background:** NNJ is a frequent complication of G6PD deficiency.

**Methods:** A cross-sectional study was carried out on 487 Egyptian neonates with indirect hyperbilirubinemia from June 2018 to July 2019. The collected data included maternal and neonatal characteristics. Laboratory investigations included serum bilirubin, reticulocyte count, ABO grouping, Rh typing, and neonatal serum G6PD. The mothers were interviewed individually using a structured, researcher administered questionnaire for assessing the perceptions of G6PD deficiency and NNJ.

**Results:** Prevalence of G6PD deficiency had been reported in 10.10%. Regarding bilirubin level, neonates with G6PD deficiency showed higher levels of serum bilirubin ( $P<0.001$ ). Male sex, positive family history, and positive consanguinity worked as risk factors for G6PD deficiency (OR=4.27, 9.54 and 10.21 respectively). Regarding mothers' perception towards NNJ and G6PD, it was low towards both diseases, where good knowledge was reported in 30% for NNJ vs. 17.10% for G6PD deficiency, positive attitude (46.8% for NNJ vs. 45.0% for G6PD deficiency) and finally good practice (29.9% for NNJ vs. 19.9% for G6PD deficiency)

**Conclusion:** G6PD deficiency seems to be an important cause of NNJ. The study revealed that mothers' perception of NNJ and G6PD deficiency was low. A mass health education program about G6PD deficiency and NNJ is needed to ensure better early detection, good timing treatment and better prevention of the triggering factors to ensure better health of the children.

**Keywords:** Awareness, G6PD deficiency, NNJ, Perception, KAP, Child health, Epidemiology

### **Strength and limitations:**

#### ***Strengths:***

- The study collectively assessed the prevalence and risk factors of G6PD deficiency besides assessing the level of knowledge, attitude, and practice (KAP) regarding both of G6PD deficiency and neonatal jaundice (NNJ) in our environment.
- The study clarified the extent of change towards NNJ based on previous levels published in some research articles in the same region and also drew how much G6PD deficiency despite being a serious disease; it is a poorly known one, making a special recommendation of health education sessions for every mother to be conducted in health centers from day one.
- A suitable sample size had been studied in a short period, which allowed us to reach large number of mothers and families.

#### ***Limitations:***

- We reached only the mothers who sought medical advice for their neonates. Both diseases need KAP assessment among the general population to ensure taking care of the risk factors, but we tried to help the mothers be messengers to their families specially after conducting a health education session during the day organized to thank them for participation in the study.
- Unfortunately, there was a need to perform a posttest to assess the extent of understanding and KAP among the studied mothers to ensure providing right message, but it was difficult to collect this studied number one more time

### **Introduction:**

The term 'jaundice' is used to describe the yellow-orange discoloration of the skin and sclera because of excessive bilirubin in the skin and mucous membranes. (1) It is not a disease, but rather a symptom or sign of a disease. (2) Jaundice (Hyperbilirubinemia) though a common benign occurrence in the 1st week of life can sometimes progress to critical levels. (3) Neonatal jaundice is a frequent complication of Glucose 6 phosphate dehydrogenase (G6PD) deficiency which is a genetic disease frequently affects males. (4, 5) African, Asia, Mediterranean, and Middle-Eastern descents are most commonly affected by this disorder (6, 7) Prevalence of G6PD

1  
2  
3 deficiency among Egyptian neonates is (8.9%). (8) The disease was reported for the first time in  
4 India, and then it reaches in some countries up to 25% prevalence. (9) The commonly  
5 asymptomatic G6PD deficiency can be triggered by some agents like specific foods, drugs, and  
6 infections which may result in a hemolytic reaction. (5) Treatment for G6PD deficiency is simple  
7 and inexpensive (9) and can be started before symptoms appear. (10, 7) Counseling should be  
8 directed to parents of deficient newborns to avoid risks of jaundice and triggering agents.  
9 (9). Studying the level of knowledge, attitude, and practice about G6PD and neonatal jaundice in  
10 our environment, to allow ensuring the avoidance of triggering factors is essential. So this study  
11 aimed to estimate the prevalence of G6PD deficiency among Egyptian jaundiced neonates and  
12 assessing the mothers' perception through studying their level of knowledge, attitude and  
13 practice regarding G6PD and neonatal jaundice.  
14  
15  
16  
17  
18  
19  
20  
21  
22

### 23 **Subjects & Methods:**

24  
25 A cross-sectional study was carried out in Egypt on 487 neonates with indirect  
26 hyperbilirubinemia in time frame of 12 months (from June 2018 to June 2019). The study  
27 had been approved by the local ethical committee and after explanation of the study,  
28 written consent had been received from parents and caregivers. Up to 10 days of age with  
29 clinically evident jaundice, admitted term and preterm neonates were included in the  
30 study. The exclusion criteria included neonates with direct hyper-bilirubinemia (> 20%),  
31 metabolism errors, congenital anomalies and sepsis. The collected data included maternal  
32 and neonatal characteristics in the form of gestational age, parity, gravidity, neonatal sex,  
33 weight, and jaundice age of onset. The studied neonates had been subjected to laboratory  
34 investigations including serum bilirubin (total, direct, indirect), reticulocyte count, ABO  
35 grouping and Rh typing of the mother and baby, Coombs test and C reactive protein. UV-  
36 Kinetic Method using cellular enzyme determination reagents by spectrophotometry was  
37 used to measure quantitative estimation of serum G6PD by using 1ml of whole blood  
38 collected in an EDTA tube. Level <4.6 u/g Hb was estimated to define G6PD deficiency. For  
39 assessing the perceptions of G6PD deficiency and neonatal jaundice, the mothers were  
40 interviewed individually using a researcher administered questionnaire about their idea  
41 about neonatal jaundice (NNJ) and G6PD. For NNJ, the questionnaire included questions  
42 like mother's knowledge regarding its diagnosis, causes, complications and treatment.  
43  
44  
45  
46  
47  
48  
49  
50  
51  
52  
53  
54  
55  
56  
57  
58  
59  
60

1  
2  
3 Regarding the attitude of mothers toward NNJ and its treatment; the questions included if  
4 the mother thinks that NNJ is a worrisome condition, etc. For practice, if she would seek  
5 medical advice. Etc. Regarding G6PD deficiency, the questionnaire included questions like  
6 if G6PD; is a Blood disease, both parents have to be carriers for G6PD, the inheritance of  
7 G6PD related to the baby's gender, agents that can trigger an attack of G6PD like Fava  
8 beans and medications, is pallor, giddiness, shortness of breath or jaundice a symptom of  
9 G6PD attack, are GIT symptoms like (nausea and vomiting) are symptoms of G6PD attack.  
10 Regarding attitude, if she sees that this is a serious problem, marriage between contagious  
11 couples is a cause, etc. Regarding practice, the questionnaire included; seeking medical  
12 advice, premarital counseling, etc., With answers scored as correct = 1 and incorrect = 0;  
13 participants with at least 60% correct answers were considered as having good knowledge.  
14 Participants with at least 60% positive answers were considered as having a positive  
15 attitude and practice. A health education talk was given by the researcher to the participant  
16 mothers, with adequate clarification.  
17  
18  
19  
20  
21  
22  
23  
24  
25  
26  
27

28  
29 **Sample size calculation:** Based on past review of literature (8) who reported that prevalence of  
30 G6PD among jaundiced newborn to be 8.9%, sample size has been calculated using the  
31 following equation:  $n = (z^2 \times p \times q) / D^2$  at CI 95% and it was estimated to be 487 jaundiced  
32 neonates  
33  
34  
35

36  
37 **Statistical analysis:** Data were analyzed by using SPSS version 22 (SPSS Inc., Chicago, IL,  
38 USA). An independent t-test and ANOVA test were used for normally distributed quantitative.  
39 Chi-square ( $\chi^2$ ) was used for qualitative variables. Odds ratio (OR) was used to assess the risk of  
40 exposure. P-value less than 0.05 was considered statistically significant.  
41  
42  
43

#### 44 **Patient and Public Involvement:**

45 This work aimed to study the prevalence of G6PD deficiency among Egyptian jaundiced  
46 neonates and mothers' perception regarding both diseases. To improve the relevance of research,  
47 oriented research including patient and public is vital. A paper-based survey asked some mothers  
48 seeking medical advice in some neonatal and pediatric centers to submit their unanswered  
49 questions regarding G6PD and NNJ. The final top four research priorities in an in-person  
50 meeting were ranked. Thirty respondents submitted forty questions. The respondents were from  
51 urban and rural areas. Their ages ranged from 20-40 years. The forty questions were distilled to  
52  
53  
54  
55  
56  
57  
58  
59  
60



seventeen unique questions and from this list; the top four research questions prioritized included if these diseases are infectious ones, if they can be transferred to the next generations, if they are long-life diseases and if there is a complete cure. The respondents were subjected to questionnaires by observers to assess the degree of response and reactivity. The interviewed mothers recommended to generalize the screening over large number and to be in the most crowded districts, so we asked them to tell every pregnant woman they know to seek medical advice for free in certain neonatal centers, where we are working, if there is a doubt of having a yellow baby to encourage them participate in the study. We organized a special day in our region in order to thank all participants in the first place, disseminate the results and provide in-depth health education session about the two diseases. The main aim of the health education session was to correct the wrong information and to build a base for new mothers' generation who know well these diseases and be messengers to their families and surroundings.

### Results:

The study was conducted on 478 Egyptian jaundiced neonates. The mothers' age ranged from 22-39 years ( $31.45 \pm 4.77$ ). Neonates aged (0-10 days) were distributed in 69.6% males versus 30.4% females. Their birth weight ranged from (2.30-3.50 Kg). Bilirubin levels were distributed into total ( $15.17 \pm 5.14$ ), Direct ( $1.08 \pm 0.38$ ) and indirect ( $13.17 \pm 3.74$ ). Mean Hb showed a good level of about ( $12.18 \pm 1.75$ ) despite low and high range (9.50-14.50). **(Table 1)** Prevalence of G6PD deficiency had been reported in 10.10% ( $< 4.6$  u/g Hb). **(Fig 1)** Regarding bilirubin level, neonates with G6PD deficiency showed higher levels of bilirubin (total, direct and indirect) ( $P < 0.001$ ). Male sex showed that it is riskier to G6PD deficiency (OR=4.27, CI95%: **1.66-10.99**). Also, neonates with a positive family history of G6PD deficiency and a positive consanguinity seemed to be more at risk of acquiring G6PD deficiency (OR=9.54, CI 95% 4.80-18.95) and (OR=10.21, CI 95%: 5.39-19.33) respectively. **(Table 2)** Positive correlation had been noticed between G6PD and jaundice time of onset. **(Fig 2)** One of the interesting findings was that total bilirubin was higher in G6PD deficient cases ( $23.03 \pm 2.94$ ) than those with RH ( $15.7 \pm 4.75$ ) or ABO incompatibility ( $11.0 \pm 2.59$ ) **(Fig. 3)**. Regarding knowledge, attitude and practice (KAP) towards NNJ and G6PD, it seems that mothers showed somehow better perception towards jaundice in comparison to G6PD deficiency, but unfortunately KAP was low towards both diseases as majority of mothers (95.9%) didn't know term (G6PD deficiency) while about 24% of them heard about fava bean anemia, also 90% of them didn't know that both parents

1  
2  
3 have to be carriers for G6PD deficiency to have an affected child. All mothers knew about fava  
4 beans can trigger an attack of G6PD deficiency while 39.3% knew that it is triggered by drugs  
5 **(Table 3)**. Almost all mothers know about neonatal jaundice, about 70% of them thought that  
6 prematurity is a cause of neonatal jaundice, 68.6% of the mothers knew that they can detect  
7 jaundice in their newborn in skin while 25% of them reported that jaundice can be defined in  
8 sclera of newborn about 95% of the mothers knew that phototherapy is method of treatment of  
9 NNJ. **(Table 4)** Good knowledge was reported in 30% for NNJ vs. 17.10% for G6PD deficiency,  
10 positive attitude was reported in 46.8% for NNJ vs. 45.0% for G6PD deficiency and finally good  
11 practice was reported in 29.9% for NNJ vs. 19.9% for G6PD deficiency **(Fig. 4)**

### 12 **Discussion:**

13 Worldwide, G6PD deficiency is the most commonly deficient enzyme. African, Asia,  
14 Mediterranean, and Middle-Eastern descents are most commonly affected by this disorder. In the  
15 current study; the prevalence of G6PD deficiency had been reported in 10.1% of jaundiced  
16 neonates which lied in the range of 8.9-30.2% of the prevalence of G6PD deficiency in Egyptian  
17 studies conducted in Egyptian governorates, Menoufia and Giza, which revealed that G6PD  
18 deficiency represented 8.9 % and 30.2% respectively among jaundiced newborns. (8, 11) The  
19 higher prevalence of G6PD deficiency among jaundiced neonates in El-Menshay et al., (11) may  
20 be due to nature of the chosen small sized purposive sample. This wide range could be explained  
21 by that special Egypt's geographical position between three continents with different ethnic  
22 groups results in wide variation of the prevalence of G6PD deficiency in different sectors, which  
23 is the same case on global scale where in Iraq, prevalence was 10.65% (12), in Iran, it was  
24 around 9% (13) and in South Brazil it was 7.9%. (14) Regarding bilirubin level in the present  
25 study, neonates with decreased G6PD showed higher levels of bilirubin and this result goes  
26 parallel to that of Bahraini and Nigerian studies conducted by Isa et al., (15) and Badejoko et al.,  
27 (16) respectively. Male sex showed to be more risky to G6PD deficiency which is similar to  
28 findings reported in Egypt by Abo El Fotoh and Rizk (8), Abo Elella et al., (10) and El-Menshay  
29 et al.,(11), in India by Sinha et al., (17) and in Iran by Eghbalian and Monsef (18). In the current  
30 study; neonates with a positive family history of G6PD deficiency and a positive consanguinity  
31 were more at risk of acquiring G6PD deficiency which is in line with an Egyptian study  
32 conducted by Abo El Fotoh and Rizk (8). In India, Garg and Joag (19) found that about 20.4% of  
33 neonates with G6PD deficiency born from consanguineous parents. On the contrary a study  
34  
35  
36  
37  
38  
39  
40  
41  
42  
43  
44  
45  
46  
47  
48  
49  
50  
51  
52  
53  
54  
55  
56  
57  
58  
59  
60

1  
2  
3 conducted in Japan concluded that only one case of G6PD deficiency was detected and born to  
4 non-consanguineous, Japanese parents without any family history. (20) The current study found a  
5 positive correlation between G6PD deficiency and jaundice time of onset. As known, two peaks  
6 for jaundiced patients to be admitted, the first is on the 3<sup>rd</sup> day and the second is on the 7<sup>th</sup> day of  
7 life. Bimodal peaks of maximum serum bilirubin concentrations are known to happen among  
8 G6PD deficient infants and when the hemolytic episode starts early, the elevation of serum  
9 bilirubin is anticipated to be clear and hence a course of hyperbilirubinemia may, therefore, be  
10 predicted. (21) The finding is in agreement with Abo El Fotoh and Rizk (8). But it is in  
11 disagreement with result of Turkish study conducted by Atay et al., (22) who reported a non-  
12 statistical difference was detected between G6PD-deficient and normal groups concerning the  
13 time of onset of jaundice. Regarding total bilirubin level; the present study reported that it was  
14 obviously higher in G6PD deficient cases than those with RH or ABO incompatibility and this  
15 finding agrees with that concluded by Das and Singh (23) in India and Hussain et al., (24) in  
16 Pakistan who found that serum bilirubin level was higher among G6PD deficient neonates than  
17 those suffered from RH and ABO incompatibility. In contrary to this finding, the results obtained  
18 by Shah and Yeo (25) in Singapore and Aletayeb et al.(26) in Iran who showed no significant  
19 difference in serum bilirubin level in G6PD deficiency, ABO or RH incompatibility. Regarding  
20 knowledge, attitude and practice towards jaundice and G6PD, majority of mothers (95.9%) didn't  
21 know the term (G6PD deficiency) which isn't agreed with Al-Joborae, (27) who found that about  
22 91% of mothers in Iraq heard about G6PD deficiency. In Egypt, the most commonly used term is  
23 "Fava bean anemia", so in our study, 23% of mother heard about Fava bean anemia but 4.1%  
24 only knew the term "G6PD deficiency anemia". All mothers knew that fava beans can trigger an  
25 attack of G6PD deficiency, hence the term came from, which is in agreement with a study  
26 carried out in Bahrain by Al Arrayed and Al Hajeri, (28). In our study, about 40% of mother  
27 thought that hemolysis can be triggered by some sort of drugs and this result is inconsistent with  
28 that obtained by Almuahini et al., (29). Regarding mother's knowledge about neonatal jaundice,  
29 all mothers heard about it and about 40% of them reported that prematurity of the infant is a  
30 cause of its occurrence and this result is consistent with that provided by Magfour et a., (30) in  
31 Saudi Arabia as they found that 54.5% of the respondent said that prematurity of newborn is a  
32 cause for NNJ. Also in the present study, 68.6% of the mothers knew that they can detect  
33 jaundice in their newborn in the skin while 25% of them reported that jaundice can be defined in  
34  
35  
36  
37  
38  
39  
40  
41  
42  
43  
44  
45  
46  
47  
48  
49  
50  
51  
52  
53  
54  
55  
56  
57  
58  
59  
60

1  
2  
3 the sclera of a newborn. These findings agree with that achieved by Aggarwal et al., (31) in India  
4 who reported that 50.6% of the mothers can identify the correct site to detect jaundice in  
5 newborns. It seems that mothers showed somehow better perception towards jaundice in comparison to  
6 G6PD deficiency. This is in agreement results reported by Boo et al., (32) in Malaysia. Our results still  
7 showed poor KAP regarding both diseases. This is in agreement with Goodman et al., (33) in Nigeria who  
8 found that most of the mothers had poor knowledge about neonatal jaundice, Alfouwais et al., (34) in  
9 Saudi Arabia who revealed that knowledge of Saudi parents about neonatal jaundice was average. The  
10 study results showed some improvement in level of knowledge in comparison with Allahaony et al (35)  
11 who reported regarding NNJ that only 18.9% of mothers had good knowledge, 48.0% had good attitude  
12 and only 25.3% had a good practice, which shows the effect of health education carried out to the mothers  
13 but it shows also that we are still in a bad need to more extensive and focused health education. (Sadat et  
14 al., (36) and Rabiyeepoor, (37) in Iran reported that risk factors for hyperbilirubinemia were ABO  
15 incompatibility, prematurity, and infection. In contrast to the study results, Al-Joborae, (27) in Iraq and Al  
16 Arrayed et al., (28) reported that the mothers had a fairly good level of awareness of G6PD deficiency.

17  
18  
19  
20  
21  
22  
23  
24  
25  
26  
27 **Conclusion:** G6PD deficiency seems to be an important cause of neonatal jaundice. Cord blood  
28 G6PD screening is better to be performed in high-risk populations, to early consider a prolonged  
29 hospital stay after birth. G6PD deficiency and NNJ are serious conditions so be studying KAP of  
30 mothers about them, the study revealed that mothers' KAP about neonatal jaundice despite being  
31 still low but it shows promising improvement while KAP about G6PD deficiency is so poor. So  
32 it so evitable to apply a mass health education program about G6PD deficiency and also NNJ to  
33 ensure better early detection, good timing treatment and better prevention of the triggering  
34 factors to ensure better health of the children.

35  
36  
37  
38  
39  
40  
41 **Acknowledgement:** Thanks for participants and the team who helped in data collection

42  
43  
44  
45  
46  
47  
48  
49  
50  
51 **Ethical Approval:** Institutional Review Boards (IRB) of the Menoufia faculty of medicine had  
52 approved the study. Research work had been performed in accordance with the Declaration of  
53 Helsinki. A written patient's Consent was taken after explanation of all aspects of the study and  
54 gave them the right to withdraw at any time.

55  
56  
57  
58  
59  
60 **Data sharing statement:** Data are available to be shared on request by e. mailing  
[zeinabkasemy@yahoo.com](mailto:zeinabkasemy@yahoo.com)

**Funding Disclosures:** All authors certify that no funding has been received for the conduct of  
this study and/or preparation of this manuscript.

## References

1. Khan R, Houlihan D. Newsome PN. Investigating jaundice. *Medicine*. 2015; 43(10):573–576.
2. Brits H, Adendorff J, Huisamen D, Beukes D, Botha K, Herbst H, Joubert G: The prevalence of neonatal jaundice and risk factors in healthy term neonates at National District Hospital in Bloemfontein. *Afr J Prim Health Care Fam Med*. 2018; 10(1): 1582.
3. Watson RL. Hyperbilirubinemia. *Crit Care Nurs Clin North Am* 2009; 21:97-120.
4. Beutler E. Glucose-6-phosphate dehydrogenase deficiency: a historical perspective. *Blood*. 2008; 111(1):16-24.
5. Kaplan M, Hammerman C. Neonatal screening for glucose-6-phosphate dehydrogenase deficiency: biochemical versus genetic technologies. *Semin Perinatol*. 2011; 35(3):155-61.
6. Frank JE. Diagnosis and management of G6PD deficiency *Am Fam Physician*. 2005 Oct 1;72(7):1277-82.
7. Abo El Fotoh M, Rizk M: Prevalence of glucose-6-phosphate dehydrogenase deficiency in jaundiced Egyptian neonates. *J Matern Fetal Neonatal Med*. 2016 Dec;29(23):3834-7.
8. Abo Elella S, Tawfik M, Barseem N, and Moustafa W: Prevalence of glucose-6-phosphate dehydrogenase deficiency in neonates in Egypt. *Ann Saudi Med*. 2017; 37(5): 362–365.
9. La Rue N, Kahn M, Murray M, Leader BT, Bansil P, McGray S, Kalnoky M, Zhang H, Abo Elella S, Tawfik M, Barseem N, and Moustafa W: Prevalence of glucose-6-phosphate dehydrogenase deficiency in neonates in Egypt. *Ann Saudi Med*. 2017; 37(5): 362–365.
10. Glader B. Hereditary hemolytic anemias due to red blood cell enzyme disorders. In: Greer JP, Foerster J, Rodgers GM, et al., editors. *Wintrobe's Clinical Hematology*. 12th ed. Lippincott, Williams & Wilkins; Philadelphia: 2009; 933.
11. El-Menshay A, Khalifa N, Awad S, Fathy M and Amer A. Prevalence of Glucose-6-phosphate Dehydrogenase Deficiency in Jaundiced Neonates in Egypt. *Australian Journal of Basic and Applied Sciences*, 2009; 3(3): 2016-2023.
12. Frankool WM, Al-Tu'ma FJ. Molecular basis of G6PD deficiency in hyperbilirubinemic neonates in Middle Euphrates Province: Iraq. *Karbala J Med* 2010;3:98–102.
13. Karimi M, Martinez di Montemuros F, Danielli MG, et al. Molecular characterization of glucose-6-phosphate dehydrogenase deficiency in the Fars province of Iran. *Haematologica* 2003;88: 346–7.
14. Castro S, Weber R, Dadalt V, et al. Prevalence of G6PD deficiency in newborns in the south of Brazil. *J Med Screen* 2006;13:85–6.
15. Isa H, Mohamed M, Mohamed A, Abdulla A, Abdulla F: Neonatal indirect hyperbilirubinemia and glucose-6-phosphate dehydrogenase deficiency, *Korean J Pediatr*. 2017; 60(4): 106–111.
16. Badejoko BO, Owa JA, Oseni SBA, Badejoko O, Fatusi AO, Adejuyigbe EA. Early Neonatal Bilirubin, Hematocrit, and Glucose-6-Phosphate Dehydrogenase Status, *Pediatrics* 2014;134(4) e1082-1088

17. Sinha R, Sachendra B, Syed S, Nair L, John B. To study the prevalence of glucose 6 phosphate dehydrogenase(G6PD) deficiency in neonates with neonatal hyperbilirubinemia and to compare the course of the neonatal jaundice in deficient versus non deficient neonates.2017; 6(2) 71-74
18. Eghbalian E, Monsef A, Evaluation of Glucose-6-Phosphate Dehydrogenase Deficiency without Hemolysis in Icteric Newborns. Iran J Pediatr. 2007; 17( 1) Das M, Singh A. A comparative study of peak total serum bilirubin level in neonates with ABO incompatibility, Rh incompatibility and G6PD deficiency. IOSR Journal of Dental and Medical Sciences (IOSR-JDMS). 2018; 17 (10):21-23.
19. Garg s, Joag G. Assessment of the prevalence of G6PD deficiency in RBCs of live newborns born at tertiary care hospital. International Journal of Contemporary Pediatrics Garg S et al. Int J Contemp Pediatr. 2019; 6 (2):676-682.
20. Tsuzuki,S, Akahira-Azuma M, Kaneshige M, Shoya K , Hosokawa Sh, Kanno H, Matsushita T. A Japanese neonatal case of glucose-6-phosphate dehydrogenase deficiency presenting as severe jaundice and hemolytic anemia without apparent trigger, Springerplus. 2013; 2: 434
21. Valaes T. Severe neonatal jaundice associated with glucose-6- phosphate dehydrogenase deficiency: pathogenesis and globalepidemiology. Acta Paediatr Suppl 1994; 394:58-76.
22. Atay E, Bozaykut A, Ipek I: Glucose-6-phosphate Dehydrogenase Deficiency in Neonatal Indirect Hyperbilirubinemia. Journal of Tropical Pediatrics. 2006; 52, (1):56-58
23. Das M, Singh A. A comparative study of peak total serum bilirubin level in neonates with ABO incompatibility, Rh incompatibility and G6PD deficiency. IOSR Journal of Dental and Medical Sciences (IOSR-JDMS) :2018 ; 17, 10 ( 2) , 21-23.
24. Hussain M, Irshad M, Kalim M, Ali L. Glucose-6-Phosphate Dehydrogenase Deficiency In Jaundiced Neonates .JMPI. 2010; 94(2): 122-196.
25. Shah V, Yeo C. Identifying Risk of Neonatal Hyperbilirubinaemia and Early Discharge for Glucose-6-Phosphate Dehydrogenase Deficient Newborns in Singapore. Ann Acad Med Singapore 2007; 36: 1003-1009
26. Aletayeb S, Dehdashtian M , Aramesh M, Arash M, Hedayati Z and Taher M.Outcome of Jaundice in neonates with ABO and Rh blood incompatibility and glucose-6-phosphate dehydrogenase deficiency: Biomedical Research 2017; 28 (8): 3440-3444
27. Al-Joborae S. Extent of Knowledge of Mothers of Neonates with G6PD Deficiency in Hilla City. Journal of Babylon University/ Pure and Applied Sciences. 2015;23(4): 1542-1550
28. Al Arrayed S, Al Hajeri A. Public Awareness of Glucose-6-Phosphate Dehydrogenase (G6PD) Deficiency. Bahrain Medical Bulletin, 2011;33: (3), available at: [https://www.researchgate.net/publication/301640243\\_Public\\_Awareness\\_of\\_Glucose\\_6-Phosphate\\_Dehydrogenase\\_Deficiency\\_in\\_Sokoto](https://www.researchgate.net/publication/301640243_Public_Awareness_of_Glucose_6-Phosphate_Dehydrogenase_Deficiency_in_Sokoto)
29. Almuahini MS, Alruzayhi MK, Alwassel AI, Alateeq OM: Public Awareness of Glucose-6-Phosphate Dehydrogenase (G6PD) Deficiency Causes and Prevalence Factors: The Journal of Middle East and North Africa Sciences 2018; 4(2) available at:<http://oaji.net/pdf.html?n=2017/2705-1517398879.pdf>

- 1  
2  
3  
4  
5  
6  
7  
8  
9  
10  
11  
12  
13  
14  
15  
16  
17  
18  
19  
20  
21  
22  
23  
24  
25  
26  
27  
28  
29  
30  
31  
32  
33  
34  
35  
36  
37  
38  
39  
40  
41  
42  
43  
44  
45  
46  
47  
48  
49  
50  
51  
52  
53  
54  
55  
56  
57  
58  
59  
60
30. Magfouri H, Aqeel A, Maashi A, Maghfuri N, Jarad R, Kathiah AA, Abdu DA, Almudeer A. Mothers' perception of neonatal jaundice in Jazan Region, KSA. *J Clin Neonatol* 2019; 8:116-9
  31. Aggarwal B, Agrawal A, Chaudhary P, Gupta G, Rana S, Gupta S. Neonatal Jaundice: Knowledge, attitude beliefs, and practices of postnatal mothers in a tertiary care hospital in Uttarakhand, India. *Indian J Child Health*.2017; 4(4):603-608.
  32. Boo N, Gan C, Gian Y, Lim K, Lim M, Krishna-Kumar H. Malaysian Mothers' Knowledge & Practices on Care of Neonatal Jaundice. *Med J Malaysia*.2011; 66(3):239-43.
  33. Goodman O, Kehinde O, Odugbemi B, Femi-Adebayo T, Odusanya O. Neonatal Jaundice: Knowledge, Attitude and practices of mothers in Mosan-Okunola community, Lagos, Nigeria.2015;22(3): 158-163.
  34. Alfouwais N, Seada L, Alahmadi R, Alassiri A. Assessment of Knowledge, Attitude and Practice of Saudi Parents towards Neonatal Jaundice (NNJ): The Egyptian Journal of Hospital Medicine. 2018; 70 (9):1686-1694
  35. Allahony DM, Hegazy NN, Kasemy ZA, Bahgat EM. Mothers' perception toward neonatal jaundice in Kafr El-batanoon village, Menoufia, Egypt. *Menoufia Medical Journal* 2016; 29:743-748
  36. Saadat SH, Naderi S, Zare S, Khalili S, Darban B, Goodarzi R. Epidemiologic Study of Jaundice in Newborns with Jaundice in the First 24 hours of Birth in Children's Hospital and Shariati Hospital of Bandar Abbas in 2010-2014. *Journal of Research in Medical and Dental Science* 2018; 6( 1): 113-117
  37. Rabiyeepoor S, Gheibi Sh, Jafari S. To Study the Knowledge and Attitude of Postnatal Mothers on Neonatal Jaundice in Motahari Hospital, Iran. *Clinical Medicine Research* 2014; 3(1): 1-5

1  
2  
3 **Legend of figure:**  
4

5 Fig 1: Prevalence of G6PD deficiency among the studied jaundiced neonate group  
6

7 Fig 2: Correlation between G6PD and Jaundice time of onset in deficient cases  
8

9 Fig 3: Total bilirubin distribution among patients with G6PD deficiency, RH incompatibility and  
10 ABO incompatibility  
11

12  
13 Fig 4: Perception of G6PD deficiency and neonatal jaundice among the studied mothers  
14  
15  
16  
17  
18  
19  
20  
21  
22  
23  
24  
25  
26  
27  
28  
29  
30  
31  
32  
33  
34  
35  
36  
37  
38  
39  
40  
41  
42  
43  
44  
45  
46  
47  
48  
49  
50  
51  
52  
53  
54  
55  
56  
57  
58  
59  
60



**Table 1: General characteristics of the studied mothers and jaundiced neonates :**

| General characteristics         | Study group<br>(n=487) |             |
|---------------------------------|------------------------|-------------|
|                                 | Mean $\pm$ SD          | Range       |
| <b>Mothers' characteristics</b> |                        |             |
| Age (Y)                         | 31.45 $\pm$ 4.77       | 22-39       |
| Gestational age(week)           | 37.71 $\pm$ 1.05       | 37-41       |
| BMI(kg/m <sup>2</sup> )         | 22.02 $\pm$ 2.37       | 18.30-27.10 |
|                                 | no                     | %           |
| <b>Gravidity</b>                |                        |             |
| $\leq 3$                        | 292                    | 60.0        |
| $> 3$                           | 195                    | 40.0        |
| <b>Parity</b>                   |                        |             |
| $\leq 2$                        | 252                    | 51.7        |
| $> 2$                           | 235                    | 48.3        |
| <b>Neonatal characteristics</b> |                        |             |
|                                 | Mean $\pm$ SD          | Range       |
| <b>Sex: no,%</b>                |                        |             |
| Male                            | 339                    | 69.6        |
| Female                          | 148                    | 30.4        |
| Birth weight (kg)               | 2.60 $\pm$ 0.29        | 2.30-3.50   |
| <b>Bilirubin</b>                |                        |             |
| • Total                         | 15.17 $\pm$ 5.14       | 7.30-25.50  |
| • Direct                        | 1.08 $\pm$ 0.38        | 1.50-0.50   |
| • Indirect                      | 13.17 $\pm$ 3.74       | 6.40-23.15  |
| Hb (gm/dl)                      | 12.18 $\pm$ 1.75       | 9.50-14.50  |
| Reticulocyte count (%)          | 3.38 $\pm$ 1.30        | 1.40-6.0    |

**Table 2: Distribution of the studied G6PD groups regarding bilirubin, neonate sex, family history and consanguinity:**

|                               | G6PD                |        |                    |       | Test sig                   | of P value        | OR<br>CI 95%             |
|-------------------------------|---------------------|--------|--------------------|-------|----------------------------|-------------------|--------------------------|
|                               | Deficient<br>No.=49 |        | Normal<br>No. =438 |       |                            |                   |                          |
|                               | no                  | %      | no                 | %     |                            |                   |                          |
| <b>Bilirubin (mean ±SD)</b>   |                     |        |                    |       |                            |                   |                          |
| • <b>Total</b>                | 23.0                | 3±2.94 | 14.30              | ±4.55 | <b>t=18.40</b>             | <b>&lt;0.001*</b> | -                        |
| • <b>Direct</b>               | 1.38                | ±0.14  | 1.02               | ±0.41 | <b>t=12.47</b>             | <b>&lt;0.001*</b> |                          |
| • <b>Indirect</b>             | 17.02               | ±3.45  | 12.74              | ±3.52 | <b>t=8.21</b>              | <b>&lt;0.001</b>  |                          |
| <b>Neonate Sex</b>            |                     |        |                    |       |                            |                   |                          |
| Male                          | 42                  | 85.7   | 297                | 45.0  | <b>χ<sup>2</sup>=10.49</b> | <b>0.001*</b>     | <b>4.27(1.66-10.99)</b>  |
| Female                        | 7                   | 14.3   | 141                | 55.0  |                            |                   | <b>1.0</b>               |
| <b>Family history of G6PD</b> |                     |        |                    |       |                            |                   |                          |
| +ve                           | 37                  | 75.5   | 107                | 24.4  | <b>χ<sup>2</sup>=55.21</b> | <b>&lt;0.001*</b> | <b>9.54(4.80-18.95)</b>  |
| -ve                           | 12                  | 24.5   | 331                | 75.6  |                            |                   | <b>1.0</b>               |
| <b>Consanguinity</b>          |                     |        |                    |       |                            |                   |                          |
| +ve                           | 33                  | 67.3   | 70                 | 16.0  | <b>χ<sup>2</sup>=69.72</b> | <b>&lt;0.001*</b> | <b>10.21(5.39-19.33)</b> |
| -ve                           | 16                  | 32.7   | 368                | 84.0  |                            |                   | <b>1.0</b>               |

**\*Significant**

**Table 3: Knowledge, attitude and practice of the studied mothers regarding G6PD deficiency:**

|                                                                                        |              | No.=487 |       |                                                                 |              |
|----------------------------------------------------------------------------------------|--------------|---------|-------|-----------------------------------------------------------------|--------------|
| Knowledge                                                                              |              | no      | %     | no                                                              | %            |
| <b>Hearing about G6PD deficiency</b>                                                   |              |         |       | <b>Giddiness</b>                                                |              |
| -                                                                                      | Yes          | 2       | 4.1   | •                                                               | Yes          |
| -                                                                                      | No           | 485     | 95.9  | •                                                               | No           |
| <b>Hearing about fava bean anemia</b>                                                  |              |         |       | •                                                               | I don't know |
| •                                                                                      | Yes          | 112     | 23.0  | <b>Jaundice</b>                                                 |              |
| •                                                                                      | No           | 375     | 76.0  | •                                                               | Yes          |
| <b>G6PD is a blood disease</b>                                                         |              |         |       | •                                                               | No           |
| -                                                                                      | Yes          | 100     | 89.3  | •                                                               | I don't know |
| -                                                                                      | No           | 12      | 10.7  | <b>Shortness of breath</b>                                      |              |
| -                                                                                      | I don't know | 0       | 0.0   | •                                                               | Yes          |
| <b>Is it a hereditary disease:</b>                                                     |              |         |       | •                                                               | No           |
| •                                                                                      | Yes          | 105     | 93.8  | <b>Attitude</b>                                                 |              |
| •                                                                                      | No           | 5       | 4.5   | no                                                              | %            |
| •                                                                                      | I don't know | 2       | 1.8   | <b>Is this a serious problem</b>                                |              |
| <b>Both parents have to be carriers for G6PD deficiency to have an affected child?</b> |              |         |       | -                                                               | Yes          |
| -                                                                                      | Yes          | 5       | 4.5   | -                                                               | No           |
| -                                                                                      | No           | 1       | 0.9   | -                                                               | I don't know |
| -                                                                                      | I don't know | 101     | 90.2  | <b>Consanguinity is the cause of the disease</b>                |              |
| <b>The inheritance of G6PD deficiency related to the baby's gender?</b>                |              |         |       | -                                                               | Yes          |
| -                                                                                      | Yes          | 10      | 8.9   | -                                                               | No           |
| -                                                                                      | No           | 3       | 2.7   | -                                                               | I don't know |
| -                                                                                      | I don't know | 99      | 88.4  | <b>Next pregnancy should be prevented:</b>                      |              |
| <b>Knowing whether personally you may have a G6PD deficiency child</b>                 |              |         |       | -                                                               | Yes          |
| -                                                                                      | Yes          | 8       | 7.1   | -                                                               | No           |
| -                                                                                      | No           | 85      | 75.9  | -                                                               | I don't know |
| -                                                                                      | I don't know | 29      | 25.9  | <b>Follow-up of the diseased child should continue for life</b> |              |
| <b>There should be a family history of G6PD deficiency to result</b>                   |              |         |       | -                                                               | Yes          |
| -                                                                                      | Yes          | 75      | 67.0  | -                                                               | No           |
| -                                                                                      | No           | 15      | 13.4  | -                                                               | I don't know |
| -                                                                                      | I don't know | 62      | 55.4  | <b>Practice</b>                                                 |              |
| <b>Fava beans can trigger an attack of G6PD deficiency</b>                             |              |         |       | <b>Have you been subjected to premarital counseling</b>         |              |
| -                                                                                      | Yes          | 112     | 100.0 | -                                                               | Yes          |
| -                                                                                      | No           | 0       | 0.0   | -                                                               | No           |
| -                                                                                      | I don't know | 0       | 0.0   | <b>Have you been subjected to genetic screening</b>             |              |
| <b>Some medications Can trigger an attack of G6PD deficiency</b>                       |              |         |       | -                                                               | Yes          |
| •                                                                                      | Yes          | 44      | 39.3  | -                                                               | No           |
| •                                                                                      | No           | 10      | 8.9   | -                                                               | I don't know |
| •                                                                                      | I don't know | 58      | 51.8  | <b>Seeking medical advice after delivery to be assured</b>      |              |
| <b>Symptoms of G6PD attack:</b>                                                        |              |         |       | -                                                               | Yes          |
| <b>Pallor</b>                                                                          |              |         |       | -                                                               | No           |
| •                                                                                      | Yes          | 10      | 8.9   | <b>Attitude</b>                                                 |              |
| •                                                                                      | No           | 52      | 46.4  | no                                                              | %            |
| •                                                                                      | I don't know | 60      | 53.8  | <b>Is this a serious problem</b>                                |              |
| <b>Nausea, vomiting, anorexia and diarrhea</b>                                         |              |         |       | -                                                               | Yes          |
| •                                                                                      | Yes          | 15      | 13.4  | -                                                               | No           |
| •                                                                                      | No           | 45      | 40.2  | -                                                               | I don't know |
| •                                                                                      | I don't know | 52      | 46.4  | <b>Consanguinity is the cause of the disease</b>                |              |

**Table 4: Knowledge, attitude and practice of the studied mothers regarding NNJ:**

|                                            |     | No.=487 |                                                          |           |          |
|--------------------------------------------|-----|---------|----------------------------------------------------------|-----------|----------|
| Knowledge                                  | no  | %       | Attitude                                                 | no        | %        |
| <b>Hearing of NNJ</b>                      |     |         | NNJ is a worrisome condition?                            |           |          |
| Yes                                        | 487 | 100.0   | - Yes                                                    | 248       | 50.9     |
| No                                         | 0   | 0.0     | - No                                                     | 200       | 41.1     |
| <b>Site to detect NNJ</b>                  |     |         | - I don't know                                           | 39        | 8.0      |
| Skin                                       | 334 | 68.6    | Phototherapy is the best way in treatment                |           |          |
| Eye                                        | 123 | 25.2    | - Yes                                                    | 409       | 84       |
| Tongue                                     | 30  | 6.2     | - No                                                     | 8         | 1.6      |
| <b>Causes</b>                              |     |         | - I don't know                                           | 70        | 14.4     |
| Prematurity                                | 341 | 70.0    | Blood exchange transfusion is the best way of management | 107       | 22       |
| ABO disparity between mother and baby      | 73  | 15.0    | - Yes                                                    | 50        | 10.3     |
| Breastfeeding                              | 146 | 30.0    | - No                                                     | 330       | 67.7     |
| Infection                                  | 139 | 33.0    | - I don't know                                           |           |          |
| Hemolysis                                  | 194 | 39.8    | Is it important seeking medical advice                   |           |          |
| Dehydration                                | 170 | 34.9    | - Yes                                                    | 450       | 92.4     |
| Increased U/S examination during pregnancy | 292 | 60.0    | - No                                                     | 20        | 4.1      |
| Diabetic mothers                           | 73  | 15.0    | - I don't know                                           | 18        | 13.5     |
| Others                                     | 141 | 28.9    |                                                          |           |          |
| <b>Complications</b>                       |     |         |                                                          |           |          |
| Death                                      | 146 | 30.0    | <b>Practice</b>                                          |           |          |
| Cerebral palsy                             | 112 | 23.0    |                                                          | <b>no</b> | <b>%</b> |
| Mental retardation                         | 170 | 34.9    | <b>Seeking a medical advice if having baby with NNJ</b>  |           |          |
| Handicapping                               | 112 | 23.0    | - Yes                                                    | 477       | 95.9     |
| Hearing loss                               | 30  | 6.2     | - No                                                     | 10        | 4.1      |
|                                            |     |         | - I don't know                                           | 0         | 0.0      |
| <b>Methods of treatment</b>                |     |         | <b>Causes of denial of medical care :</b>                |           |          |
| Phototherapy                               | 461 | 94.7    |                                                          | N=10      |          |
| Blood exchange transfusion                 | 146 | 30.0    | - Afraid of hospitalization.                             | 6         | 60.0     |
| Drugs                                      | 399 | 82.0    | - Admission/ investigation not required.                 | 1         | 10.0     |
| Neon lamp                                  | 364 | 74.7    | - High cost of medical care.                             | 2         | 20.0     |
| Increase breastfeeding                     | 238 | 48.9    | - Lack of transportation.                                | 0         | 0.0      |
|                                            |     |         | - Long hours to reach hospital.                          | 0         | 0.0      |
|                                            |     |         | <b>Time of seeking medical advice within 24 h</b>        |           |          |
|                                            |     |         | - 24-48 h                                                | 136       | 28.5     |
|                                            |     |         | - ≥ 3 days                                               | 341       | 71.5     |
|                                            |     |         | <b>Continuation of breastfeeding</b>                     |           |          |
|                                            |     |         | - Yes                                                    | 448       | 92.0     |
|                                            |     |         | - No                                                     | 39        | 8.0      |

BMJ Open: first published as 10.1136/bmjopen-2019-025401 on 12 July 2019. Copyright: © 2019 BMJ Publishing Group Ltd. All rights reserved. No reuse allowed without permission.

1  
2  
3  
4  
5  
6  
7  
8  
9  
10  
11  
12  
13  
14  
15  
16  
17  
18  
19  
20  
21  
22  
23  
24  
25  
26  
27  
28  
29  
30  
31  
32  
33  
34  
35  
36  
37  
38  
39  
40  
41  
42  
43  
44  
45  
46  
47  
48  
49  
50  
51  
52  
53  
54  
55  
56  
57  
58  
59  
60

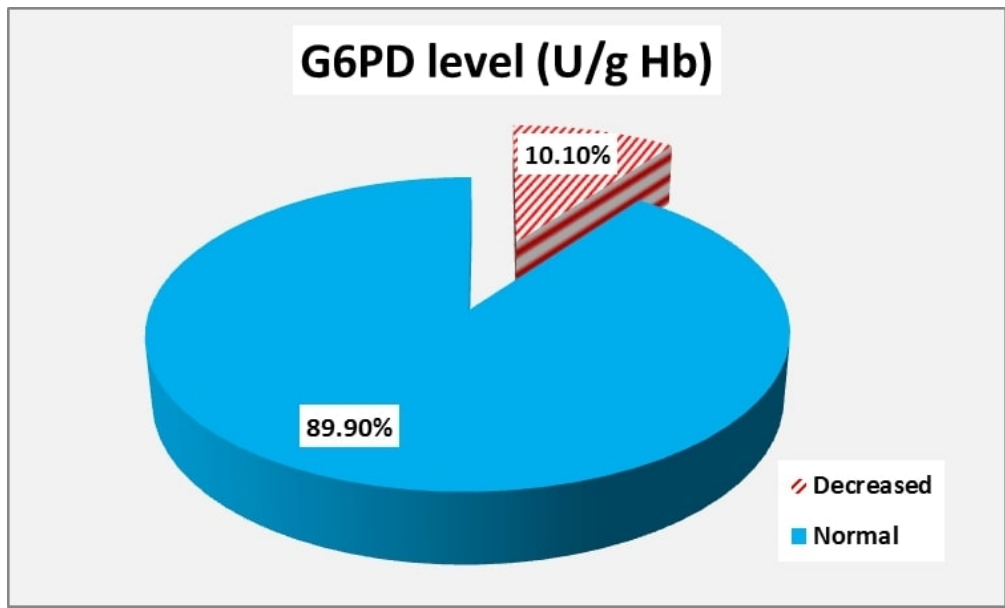

Fig 1: Prevalence of G6PD deficiency among the studied jaundiced neonate group  
265x159mm (72 x 72 DPI)

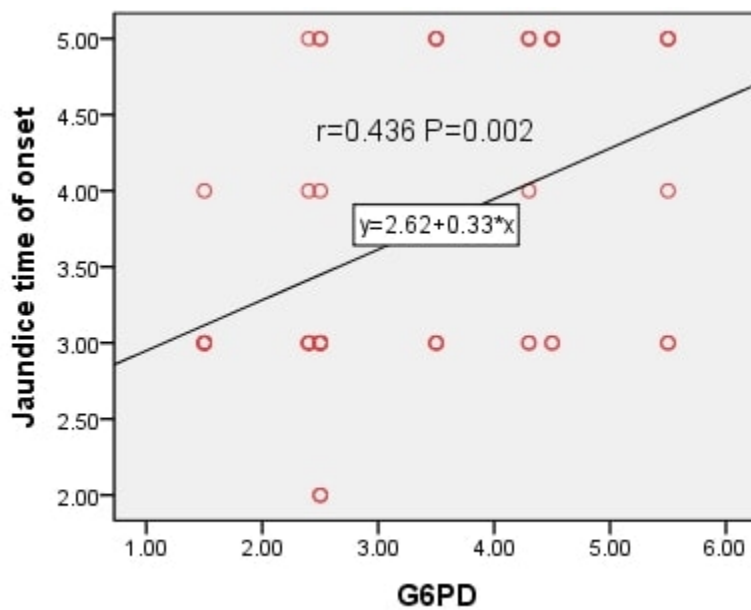

Fig 2: Correlation between G6PD and Jaundice time of onset in deficient cases

138x110mm (72 x 72 DPI)

1  
2  
3  
4  
5  
6  
7  
8  
9  
10  
11  
12  
13  
14  
15  
16  
17  
18  
19  
20  
21  
22  
23  
24  
25  
26  
27  
28  
29  
30  
31  
32  
33  
34  
35  
36  
37  
38  
39  
40  
41  
42  
43  
44  
45  
46  
47  
48  
49  
50  
51  
52  
53  
54  
55  
56  
57  
58  
59  
60

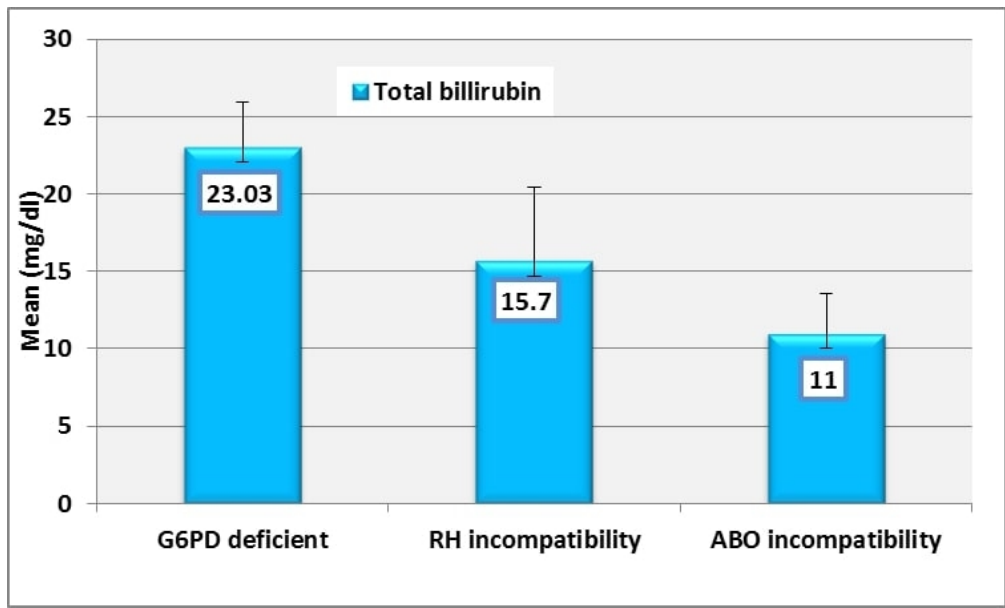

Fig 3: Total bilirubin distribution among patients with G6PD deficiency, RH incompatibility and ABO incompatibility

265x159mm (72 x 72 DPI)

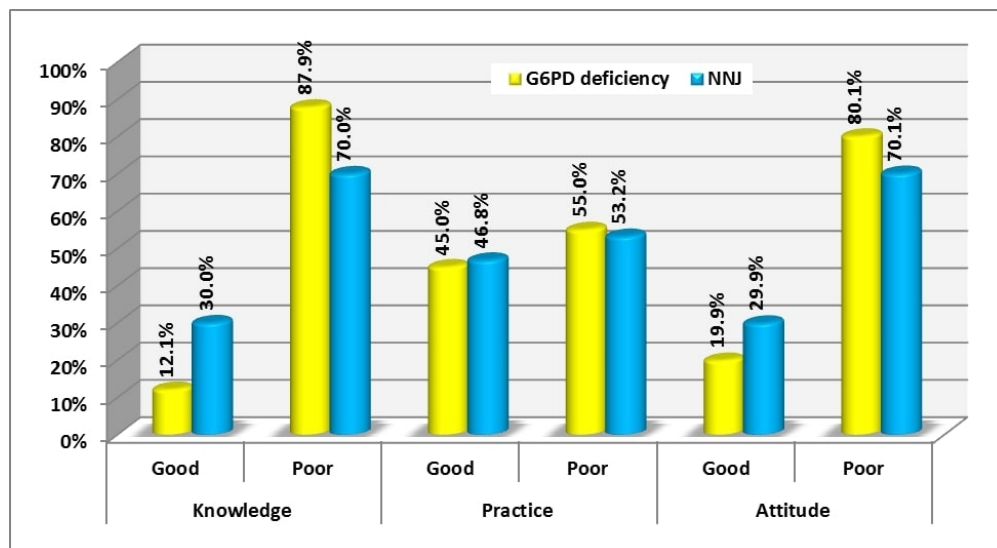

Fig 4: Perception of G6PD deficiency and neonatal jaundice among the studied mothers

343x188mm (72 x 72 DPI)



# BMJ Open

## Prevalence and Mothers' Knowledge, Attitude and practice of Glucose-6-Phosphate Dehydrogenase Deficiency among Jaundiced Neonates: A cross-sectional study

|                                 |                                                                                                                                                                                                                                                                                                                                                         |
|---------------------------------|---------------------------------------------------------------------------------------------------------------------------------------------------------------------------------------------------------------------------------------------------------------------------------------------------------------------------------------------------------|
| Journal:                        | <i>BMJ Open</i>                                                                                                                                                                                                                                                                                                                                         |
| Manuscript ID                   | bmjopen-2019-034079.R1                                                                                                                                                                                                                                                                                                                                  |
| Article Type:                   | Original research                                                                                                                                                                                                                                                                                                                                       |
| Date Submitted by the Author:   | 21-Nov-2019                                                                                                                                                                                                                                                                                                                                             |
| Complete List of Authors:       | Kasemy, Zeinab; Public Health and Community Medicine; Menoufia University Faculty of Medicine, Public Health and Community Medicine Bahbah, Wael; Menoufia University Faculty of Medicine, Pediatrics El Hefnawy, Sally; Menoufia University Faculty of Medicine, Biochemistry Alkalash, Safa; Menoufia University Faculty of Medicine, Family medicine |
| <b>Primary Subject Heading</b>: | Public health                                                                                                                                                                                                                                                                                                                                           |
| Secondary Subject Heading:      | Paediatrics                                                                                                                                                                                                                                                                                                                                             |
| Keywords:                       | Epidemiology < TROPICAL MEDICINE, Public health < INFECTIOUS DISEASES, Community child health < PAEDIATRICS, Family medicine, G6PD                                                                                                                                                                                                                      |
|                                 |                                                                                                                                                                                                                                                                                                                                                         |

SCHOLARONE™  
Manuscripts



I, the Submitting Author has the right to grant and does grant on behalf of all authors of the Work (as defined in the below author licence), an exclusive licence and/or a non-exclusive licence for contributions from authors who are: i) UK Crown employees; ii) where BMJ has agreed a CC-BY licence shall apply, and/or iii) in accordance with the terms applicable for US Federal Government officers or employees acting as part of their official duties; on a worldwide, perpetual, irrevocable, royalty-free basis to BMJ Publishing Group Ltd ("BMJ") its licensees and where the relevant Journal is co-owned by BMJ to the co-owners of the Journal, to publish the Work in this journal and any other BMJ products and to exploit all rights, as set out in our [licence](#).

The Submitting Author accepts and understands that any supply made under these terms is made by BMJ to the Submitting Author unless you are acting as an employee on behalf of your employer or a postgraduate student of an affiliated institution which is paying any applicable article publishing charge ("APC") for Open Access articles. Where the Submitting Author wishes to make the Work available on an Open Access basis (and intends to pay the relevant APC), the terms of reuse of such Open Access shall be governed by a Creative Commons licence – details of these licences and which [Creative Commons](#) licence will apply to this Work are set out in our licence referred to above.

Other than as permitted in any relevant BMJ Author's Self Archiving Policies, I confirm this Work has not been accepted for publication elsewhere, is not being considered for publication elsewhere and does not duplicate material already published. I confirm all authors consent to publication of this Work and authorise the granting of this licence.

# Prevalence and Mothers' Knowledge, Attitude and practice of Glucose-6-Phosphate Dehydrogenase Deficiency among Jaundiced Neonates: A Cross-sectional study

Running title: G6PD deficiency among Jaundiced Neonates

Zeinab A. Kasemy<sup>1</sup>, Wael A. Bahbah<sup>2</sup> Sally M. El Hefnawy<sup>3</sup>, Safa H. AlKalash<sup>4</sup>

**1**Public health and community medicine department, Menoufia faculty of medicine, Egypt

**2**Pediatrics department, Menoufia faculty of medicine, Egypt

**3**Biochemistry department, Menoufia faculty of medicine, Egypt

**4**Family medicine department, Menoufia faculty of medicine, Egypt

**Corresponding author:**

**Zeinab Abdel Aziz Kasemy**

**Tel: +201068787807**

**Address: Gamal Abdel Nasser st, 5th floor, public health department, Faculty of medicine, Shibin ELkom, Menoufia, Egypt**

**E.mail: zeinabkasemy@yahoo.com , zeinabkasemy@gmail.com , zeinab.kasemy@med.menofia.edu.eg**

**Funding: No fund**

**No conflict of interest**

**Contributor-ship statement:** All persons who meet authorship criteria are listed as authors, and all authors certify that they have participated sufficiently in the work to take public responsibility for the content, including participation in the concept, design, analysis, writing, or revision of the manuscript. Zeinab A. Kasemy has the role of getting the idea, performing statistical analysis, writing the methodology and results sections, final revision and publishing. Safa H. Al Kalash, family physician, has the role of writing the manuscript and revision. Wael A. Bahbah, the pediatrician, received, diagnosed and collected the data. Sally M. El Hefnawy had performed lab investigations. The entire team arranged a health education session to provide explanation about both diseases in all matters.

**Abstract:**

**Objectives:** To estimate the prevalence of Glucose-6-phosphate dehydrogenase (G6PD) deficiency among jaundiced neonates and assess the mothers' perception towards G6PD and Neonatal jaundice (NNJ).

**Background:** NNJ is a frequent complication of G6PD deficiency.

**Methods:** A cross-sectional study was carried out on 487 ethnic Egyptian neonates with indirect hyperbilirubinemia from June 2018 to July 2019. The collected data included maternal and neonatal characteristics. Laboratory investigations included serum bilirubin, reticulocyte count, ABO grouping, Rh typing, and neonatal serum G6PD. The mothers were interviewed individually using a structured, researcher administered questionnaire for assessing the perceptions of G6PD deficiency and NNJ.

**Results:** Prevalence of G6PD deficiency was 10.10%. Neonates with G6PD deficiency showed higher levels of serum bilirubin ( $P<0.001$ ). Male sex, positive family history, and positive consanguinity worked as risk factors for G6PD deficiency (OR=4.27, 9.54 and 10.21 respectively). Mothers' perception towards NNJ and G6PD was low towards both diseases; with only 30% have good knowledge for NNJ and 17.10% for G6PD deficiency, positive attitude (46.8% for NNJ vs. 45.0% for G6PD deficiency) and finally good practice (29.9% for NNJ vs. 19.9% for G6PD deficiency)

**Conclusion:** G6PD deficiency was shown to be strongly correlated with NNJ in our population; however mothers' perception of both NNJ and G6PD deficiency was low. A mass health education program about both diseases is needed to ensure better early detection, good timing treatment and better prevention of the triggering factors to ensure better health of the children.

**Keywords:** Awareness, G6PD deficiency, Neonatal jaundice, Perception, Knowledge Attitude Practice, Child health, Epidemiology

## Introduction:

The term 'jaundice' is used to describe the yellow-orange discoloration of the skin and conjunctiva because of excessive bilirubin in the skin and mucous membranes. (1,2) It is not a disease, but rather a symptom or sign of a disease. (3) Jaundice (Hyperbilirubinemia) though a common benign occurrence in the 1st week of life can sometimes progress to critical levels. (4) Neonatal jaundice is a frequent complication of Glucose-6-phosphate dehydrogenase (G6PD) deficiency which is a genetic disease more often observed in males as this is X linked enzymatic deficiency but in females might present deficient activity levels which is severe enough to induce hemolysis even if they are heterozygous. (5, 6) African, Asia, Mediterranean, and Middle-Eastern descents are most commonly affected by this disorder (7, 8) Prevalence of G6PD deficiency among Egyptian neonates is (8.9%). (9) G6PD enzymatic deficiency spread from India, and its prevalence increased as it moved from place to place. (10) The deficiency itself can be triggered by specific agents like specific foods, drugs, and infections rather than the risk of hemolysis. (6) Decreasing the incidence of severe hemolysis by avoiding the triggers and early beginning of treatment including intensive phototherapy is simple and inexpensive and can be started before symptoms appear. (8, 10, 11) Counseling should be directed to parents of deficient newborns to avoid risks of jaundice and triggering agents. (10). G6PD deficiency is commonly known in Egypt as fava bean anemia or favism (after intake of fava bean) as this enzyme deficiency increases the susceptibility of red blood cells to oxidant agents such as oxidants present in raw beans, some medications and oxidative stress caused by infections. (12) There are few studies conducted about prevalence of G6PD deficiency among Egyptian jaundiced neonates (9) and also about knowledge, attitude and practice (KAP) of NNJ or G6PD Deficiency (12,13), but updating the prevalence and measuring KAP about both of NNJ and G6PD deficiency in one study is not available. So, this study aimed to estimate the prevalence of G6PD deficiency among Egyptian jaundiced neonates and assess the mothers' perception through studying their level of KAP regarding G6PD deficiency and neonatal jaundice to allow ensuring the avoidance of triggering factors.

## Subjects & Methods:

A cross-sectional study was carried out in Egypt on 487 neonates with indirect hyperbilirubinemia from June 2018 to June 2019 at three Egyptian neonatal and pediatric

1  
2  
3 centers, medically serving its population and receiving patients from the surrounding areas. The  
4 studied neonates with their mothers visiting the involved pediatric and neonatal centers  
5 for seeking medical advice for treatment of jaundice were recruited from some Egyptian  
6 governorates mainly Menoufia governorate (the place of the study) and the surrounding  
7 near governorates. From 0-10 days of age with clinically evident jaundice, admitted term  
8 and preterm neonates were included in the study. The exclusion criteria included neonates  
9 with direct hyper-bilirubinemia >20% (Conjugated hyperbilirubinemia exists when more  
10 than 20% of the total bilirubin or more than 2 mg/dL is conjugated. If neither criterion is  
11 met, the hyperbilirubinemia is classified as unconjugated), metabolism errors, congenital  
12 anomalies and sepsis. All these exclusion criteria were set to be more focused on G6PD  
13 deficiency as a single cause for NNJ in this study. The collected data included maternal and  
14 neonatal characteristics in the form of gestational age (at admission), parity, gravidity,  
15 neonatal sex, weight, and jaundice age of onset (maternal recall). The studied neonates had  
16 been subjected prior to any treatment to laboratory investigations including serum  
17 bilirubin (total, direct, indirect), reticulocyte count, ABO grouping and Rh typing of the  
18 mother and baby, Coombs test (for baby only) and C reactive protein (as a routine and to  
19 exclude sepsis). UV-Kinetic Method using cellular enzyme determination reagents by  
20 spectrophotometry was used to measure quantitative estimation of serum G6PD by using  
21 1ml of whole blood collected in an EDTA tube. Level <4.6 u/g Hb was estimated to define  
22 G6PD deficiency (9). For assessing the perception of G6PD deficiency and neonatal  
23 jaundice, the mothers of both jaundiced and non-current jaundiced neonates were  
24 interviewed individually by a trained collecting data team during admission, while the  
25 neonate receiving medical examination, using a researcher administered questionnaire. We  
26 were cautious about interviewing the mothers of the current jaundiced neonates before  
27 telling them the final diagnosis to avoid taking extra-point over the mothers of non-  
28 jaundiced ones in the final analysis of the data. The questionnaire was designed by experts  
29 in pediatrics and public health specialties based on their experience in pediatrics and  
30 public involvement besides depending on published reviews of literature. A pilot study  
31 was conducted on about 30 mothers (about 6% of the calculated sample) to test the  
32 adequacy of the questionnaire for contents, language and time consuming and to explore  
33 the potential obstacles and difficulties that confront the execution of the work in addition  
34  
35  
36  
37  
38  
39  
40  
41  
42  
43  
44  
45  
46  
47  
48  
49  
50  
51  
52  
53  
54  
55  
56  
57

1  
2  
3 to being used as a tool for training of the data collecting team (5 nurses and 3 junior staff)  
4 to avoid inter and intra-observer bias. Training was conducted with the working team for 2  
5 days followed by testing to assess the degree of response to training and the quality of the  
6 asking and reporting. For NNJ, the questionnaire (Supplementary (Questionnaire))  
7 included questions like mother's knowledge regarding its diagnosis, causes, complications  
8 and treatment. Regarding the attitude of mothers toward NNJ and its treatment; the  
9 questions included if the mother thinks that NNJ is a worrisome condition, etc. For  
10 practice, if she would seek medical advice. Etc. The questionnaire (Supplementary  
11 (Questionnaire)) included questions like if the mothers have ever heard about the term  
12 G6PD deficiency or the common term (fava bean anemia), in this point we continued our  
13 questions about the common term but when analyzing the data we return to the scientific  
14 term to avoid misunderstanding for the readers. The questionnaire included questions like  
15 if G6PD deficiency is a Blood disease, both parents have to be carriers for G6PD deficiency,  
16 the inheritance of G6PD deficiency related to the baby's gender, agents that can trigger an  
17 attack of G6PD deficiency like Fava beans and medications, is pallor, shortness of breath or  
18 G6PD deficiency attack is a cause of jaundice, are GIT symptoms like (nausea and vomiting)  
19 are symptoms of G6PD deficiency attack. Regarding attitude, if she sees that this is a  
20 serious problem, marriage between contagious couples is a cause, etc. Regarding practice,  
21 the questionnaire included; seeking medical advice (a general question not specifying the  
22 current condition), premarital counseling, etc., With answers scored as correct = 1 and  
23 incorrect = 0; participants with at least 60% correct answers were considered as having  
24 good knowledge. The correct answer was determined for any single or multiple right  
25 answers in order to help estimate the final score. Participants with at least 60% positive  
26 answers were considered as having a positive attitude and practice. A health education talk  
27 was given by the researcher to the participant mothers, with adequate clarification. The  
28 study had been approved by the local ethical committee and after explanation of the study,  
29 written consent had been received from parents and caregivers.

30  
31  
32  
33  
34  
35  
36  
37  
38  
39  
40  
41  
42  
43  
44  
45  
46  
47  
48  
49  
50  
51 **Sample size calculation:** Based on past review of literature (9) who reported that prevalence of  
52 G6PD among jaundiced newborn to be 8.9% with nearly the same inclusion and exclusion  
53 criteria included in our study, sample size has been calculated using the following equation:  $n =$   
54  $(z^2 \times p \times q) / D^2$  at CI 95% and it was estimated to be 487 jaundiced neonates.  
55  
56  
57

1  
2  
3 **Statistical analysis:** Data were analyzed by using SPSS version 22 (SPSS Inc., Chicago, IL, USA).  
4 Descriptive statistics in the form of percentage (%), mean  $\pm$ SD and range were performed. An  
5 independent t-test and ANOVA test were used for normally distributed quantitative. Chi-square ( $\chi^2$ ) was  
6 used for qualitative variables. Odds ratio (OR) was used to assess the risk of exposure. OR=1: Exposure  
7 does not affect odds of outcome, OR>1: Exposure associated with higher odds of outcome and OR<1:  
8 Exposure associated with lower odds of outcome. P-value less than 0.05 set to be statistically significant.  
9  
10  
11  
12

### 13 **Patient and Public Involvement:**

14  
15 This work aimed to study the prevalence of G6PD deficiency among Egyptian jaundiced  
16 neonates and mothers' perception regarding both diseases. To improve the relevance of research,  
17 oriented research including patient and public is vital. A paper-based survey asked some mothers  
18 seeking medical advice in the three neonatal and pediatric centers to submit their unanswered  
19 questions regarding G6PD deficiency and NNJ. The final top four research priorities in an in-  
20 person meeting were ranked. Thirty respondents submitted forty questions. The respondents  
21 were from urban and rural areas. Their ages ranged from 20-40 years. The forty questions were  
22 distilled to seventeen unique questions and from this list; the top four research questions  
23 prioritized included if these diseases are infectious ones, if they can be transferred to the next  
24 generations, if they are long-life diseases and if there is a complete cure. The respondents were  
25 subjected to questionnaires by observers to assess the degree of response and reactivity. The  
26 interviewed mothers recommended to generalize the screening over large number and to be in  
27 the most crowded districts, so we asked them to tell every pregnant woman they know to seek  
28 medical advice for free in certain neonatal centers, where we are working, if there is a doubt of  
29 having a yellow baby to encourage them participate in the study. The thirty women helped us  
30 recruit about ninety two women and the rest of the sample size was based on our advertisement  
31 plus the usual patients coming to the studied centers by their own. We organized a special day at  
32 a conference meeting room to in order to thank all participants in the first place, disseminate the  
33 results and provide an in-depth group health education session about the two diseases. Special  
34 focus was directed to mothers of G6PD deficient babies to avoid triggering factors and seek  
35 medical advice promptly. For other mothers, the main aim of the health education session was to  
36 correct the wrong information and to build a base for new mothers' generation who know well  
37 these diseases and be messengers to their families and surroundings.  
38  
39  
40  
41  
42  
43  
44  
45  
46  
47  
48  
49  
50  
51  
52  
53  
54  
55  
56  
57  
58  
59  
60



## Results:

The study was conducted on 478 jaundiced neonates. The mothers' age ranged from 22-39 years (31.45 ±4.77). Neonates aged (0-10 days) were distributed in 69.6% males versus 30.4% females. Their birth weight ranged from (2.30-3.50 Kg). Bilirubin levels (mg/dl) were distributed into total bilirubin (mg/dl) (15.17 ±5.14), direct bilirubin (mg/dl) (1.08 ±0.38) and indirect bilirubin (mg/dl) (13.17 ±3.74). Mean Hb (gm/dl) showed a good level of about (12.18 ±1.75) despite low and high range (9.50-14.50) (**Table 1**) Prevalence of G6PD deficiency had been reported in 10.10% (<4.6 u/g Hb distributed as 42 males (2.88 ±0.95) and 7 females (4.0±0.57). (**Fig 1**) Neonates with G6PD deficiency showed higher levels of bilirubin (total, direct and indirect) (P<0.001). In this population of jaundiced neonates, G6PD deficient neonates were more likely to be of male gender (OR=4.27, CI95%: **1.66-10.99**), to be born of consanguineous parents (OR=10.21, CI 95%: 5.39-19.33) and to be of positive family history of G6PD deficiency (OR=9.54, CI 95% 4.80-18.95). (**Table 2**) Positive correlation had been noticed between G6PD and jaundice time of onset. (**Fig 2**) One of the interesting findings was that total bilirubin was higher in G6PD deficient cases (23.03 ±2.94, CI: 22.18-23.87, M=23, IQR: 21.3-25) than those with RH (15.7 ±4.75, CI: 14.33-17.12, M=15, IQR:11.6-18.2) or ABO incompatibility (11.0 ±2.59, CI: 10.49-11.79, M=11, IQR:9-13) (Fig. 3). Regarding knowledge, attitude and practice (KAP) towards NNJ and G6PD deficiency, it seems that mothers showed somehow better perception towards jaundice in comparison to G6PD deficiency, but unfortunately KAP was low towards both diseases as majority of mothers (95.9%) didn't know term (G6PD deficiency) while about 24% of them heard about fava bean anemia, also 90%of them didn't know that both parents have to be carriers for G6PD deficiency to have an affected child. All mothers knew fava beans can trigger an attack of G6PD deficiency while 39.3% knew that it is triggered by drugs (**Table 3**). Almost all mothers know about neonatal jaundice, about 70% of them thought that prematurity is a cause of neonatal jaundice, 68.6% of the mothers knew that they can detect jaundice in their newborn in skin while 25% of them reported that jaundice can be defined in sclera of newborn about 95% of the mothers knew that phototherapy is method of treatment of NNJ.( **Table 4**) Good knowledge was reported in 30% for NNJ vs. 17.10% for G6PD deficiency, positive attitude was reported in 46.8% for NNJ vs. 45.0% for G6PD deficiency and finally good practice was reported in 29.9% for NNJ vs. 19.9% for G6PD deficiency (**Fig. 4**)

### Discussion:

The prevalence of G6PD deficiency was reported in 10.1% of jaundiced neonates which lied in the range of 8.9-30.2% of the prevalence of G6PD deficiency in Egyptian studies conducted in Egyptian governorates, Menoufia and Giza, which revealed that G6PD deficiency represented 8.9 % and 30.2% respectively among jaundiced newborns. (9, 13) The higher prevalence of G6PD deficiency among jaundiced neonates in El-Menshay et al., (13) may be due to nature of the chosen small sized purposive sample. This wide range could be explained by that special Egypt's geographical position between three continents with different ethnic groups results in wide variation of the prevalence of G6PD deficiency in different sectors, which is the same case on global scale where in Iraq, prevalence was 10.65% (14), in Iran, it was around 9% (15) and in South Brazil it was 7.9%. (16) Neonates with decreased G6PD showed higher levels of bilirubin and this result goes parallel to that of Bahraini and Nigerian studies conducted by Isa et al., (17) and Badejoko et al., (18) respectively. Male sex showed to be more risky to G6PD deficiency which is similar to findings reported in Egypt by Abo El Fotoh and Rizk (9), Abo Elella et al., (10) and El-Menshay et al.,(13), in India by Sinha et al., (19) and in Iran by Eghbalian and Monsef (20). Positive family history of G6PD deficiency and positive consanguinity were more at risk of acquiring G6PD deficiency which is in line with an Egyptian study conducted by Abo El Fotoh and Rizk (9) and Garg and Joag (21). On the contrary a study conducted in Japan concluded that only one case of G6PD deficiency was detected and born to non-consanguineous, Japanese parents without any family history. (22) A positive correlation between G6PD deficiency and jaundice time of onset was detected. As known, two peaks for jaundiced patients to be admitted, the first is on the 3<sup>rd</sup> day and the second is on the 7<sup>th</sup> day of life. Bimodal peaks of maximum serum bilirubin concentrations are known to happen among G6PD deficient infants and when the hemolytic episode starts early, the elevation of serum bilirubin is anticipated to be clear and hence a course of hyperbilirubinemia may, therefore, be predicted. (23) The finding is in agreement with Abo El Fotoh and Rizk (9). But it is in disagreement with result of Turkish study conducted by Atay et al., (24) In this study mean Hb (gm/dl) showed a good level of about (12.18 ±1.75) despite low and high range (9.50-14.50) and this is usual for Egyptians as the prevalence of anemia among Egyptian pregnant women is about (52.5%). (25) In G6PD-deficiency, hyperbilirubinemia in is thought to be secondary to reduced hepatic conjugation and excretion of bilirubin, rather than increased bilirubin production resulting from hemolysis. (26)

1  
2  
3 Total bilirubin was obviously higher in G6PD deficient cases than those with RH or ABO  
4 incompatibility and this finding agrees with that concluded by Das and Singh (27) in India and  
5 Hussain et al., (28) in Pakistan but also in contrast to the findings obtained by Shah and Yeo (29)  
6 in Singapore and Aletayeb et al.(30) in Iran. Regarding knowledge, attitude and practice towards  
7 jaundice and G6PD, majority of mothers (95.9%) didn't know the term (G6PD deficiency) which  
8 isn't agreed with Al-Joborae, (31) who found that about 91% of mothers in Iraq heard about  
9 G6PD deficiency. In Egypt, the most commonly used term is “Fava bean anemia”, so in our  
10 study, 23% of mother heard about Fava bean anemia but 4.1% only knew the term “G6PD  
11 deficiency anemia”. All mothers knew that fava beans can trigger an attack of G6PD deficiency,  
12 hence the term came from, which is in agreement with a study carried out in Bahrain by Al  
13 Arrayed and Al Hajeri, (32). In our study, about 40% of mother thought that hemolysis can be  
14 triggered by drugs and this result is inconsistent with that obtained by Almuahini et al., (33).  
15 Regarding mother's knowledge about neonatal jaundice, all mothers heard about it and about  
16 40% of them reported that prematurity of the infant is a cause of its occurrence and this result is  
17 consistent with that provided by Magfour et a., (34) in Saudi Arabia. Also in the present study,  
18 68.6% of the mothers knew that they can detect jaundice in their newborn in the skin while 25%  
19 of them reported that jaundice can be defined in the sclera of a newborn. These findings agree  
20 with that achieved by Aggarwal et al., (35) in India. Despite of carrying out this study on a very  
21 selected group of mothers to study the KAP but really it was of benefit as most of them were  
22 experiencing for the first time a jaundiced neonate, so it seemed for us as the case of studying a  
23 group from general population besides this group will be more able to deliver the health  
24 education message as it is based on experience. It seems that mothers showed somehow better  
25 perception towards jaundice in comparison to G6PD deficiency. This is in agreement results reported by  
26 Boo et al., (36) in Malaysia. Our results still showed poor KAP regarding both diseases. This is in  
27 agreement with Goodman et al., (37) in Nigeria and Alfouwais et al., (38) in Saudi Arabia. In contrast to  
28 the study results, Al-Joborae, (31) in Iraq and Al Arrayed et al., (33) reported that the mothers had a fairly  
29 good level of awareness of G6PD deficiency. The study results showed some improvement in level of  
30 knowledge in comparison with Allahaony et al (39) who reported that only 18.9% of mothers had good  
31 knowledge, 48.0% had good attitude and only 25.3% had a good practice towards NNJ, which shows the  
32 effect of health education carried out to the mothers but it shows also that we are still in a bad need to  
33 more extensive and focused health education. The results showd that risk factors for hyperbilirubinemia  
34  
35  
36  
37  
38  
39  
40  
41  
42  
43  
44  
45  
46  
47  
48  
49  
50  
51  
52  
53  
54  
55  
56  
57  
58  
59  
60

1  
2  
3 were prematurity, ABO incompatibility, and infection, which is in agreement with (Sadat et al., (40) and  
4 Rabiyeepoor, (41) in Iran.  
5  
6

7 **Strengths:** The study collectively assessed the prevalence and risk factors of G6PD deficiency  
8 besides assessing the level of knowledge, attitude, and practice (KAP) regarding both of G6PD  
9 deficiency and neonatal jaundice (NNJ). The study clarified the extent of change towards NNJ  
10 based on previous levels published in some research articles in the same region and also drew  
11 how much G6PD deficiency despite being a serious disease; it is a poorly known one, making a  
12 special recommendation of health education sessions for every mother to be conducted in health  
13 centers from day one. A suitable sample size had been studied in a short period, which allowed  
14 us to reach large number of mothers and families.  
15  
16  
17  
18  
19  
20  
21

22 **Limitations:** There was a need to carry out more investigations to the mothers like direct  
23 Coombs test. A posttest to assess the extent of understanding and KAP among the studied  
24 mothers was needed. But it was difficult to collect this studied number one more time. We  
25 reached only the mothers who sought medical advice for their neonates. Both diseases needed  
26 KAP assessment among the general population to ensure taking care of the risk factors, but we  
27 tried to help the mothers be messengers to their families specially after conducting a health  
28 education session to thank them for participation in the study.  
29  
30  
31  
32  
33

34 **Conclusion:** G6PD deficiency seems to be an important cause of neonatal jaundice. Cord blood  
35 for complete blood count, direct Coombs' test, blood grouping, bilirubin and G6PD screening is  
36 better to be performed in high-risk populations, to early consider a prolonged hospital stay.  
37 G6PD deficiency and NNJ are serious conditions so by studying KAP of mothers, the study  
38 revealed that mothers' KAP about NNJ despite being still low but it shows promising  
39 improvement while KAP about G6PD deficiency is so poor. So it so evitable to apply a mass  
40 health education program about both of G6PD deficiency and NNJ to ensure better early  
41 detection, good timing treatment and better prevention of the triggering factors to ensure better  
42 health of the children.  
43  
44  
45  
46  
47  
48  
49

50 **Acknowledgement:** Thanks for participants and the team who helped in data collection  
51  
52

53 **Ethical Approval:** Institutional Review Boards (IRB) of the Menoufia faculty of medicine had  
54 approved the study. Research work had been performed in accordance with the Declaration of  
55  
56  
57

Helsinki. A written patient's Consent was taken after explanation of all aspects of the study and gave them the right to withdraw at any time.

**Data sharing statement:** Data are available to be shared on request by e. mailing [zeinabkasemy@yahoo.com](mailto:zeinabkasemy@yahoo.com)

**Funding Disclosures:** All authors certify that no funding has been received for the conduct of this study and/or preparation of this manuscript.

## References

1. Khan R, Houlihan D. Newsome PN. Investigating jaundice. *Medicine*. 2015; 43(10):573-576.
2. Azzuqa A., Watchko J. F., "Bilirubin Concentrations in Jaundiced Neonates with Conjunctival Icterus," *J. Pediatr*. 167(4), 840-844 (2015).10.1016/j.jpeds.2015.06.065
3. Brits H, Adendorff J, Huisamen D, Beukes D, Botha K Herbst H, Joubert G: The prevalence of neonatal jaundice and risk factors in healthy term neonates at National District Hospital in Bloemfontein. *Afr J Prim Health Care Fam Med*. 2018; 10(1): 1582.
4. Watson RL. Hyperbilirubinemia. *Crit Care Nurs Clin North Am* 2009; 21:97-120.
5. Beutler E. Glucose-6-phosphate dehydrogenase deficiency: a historical perspective. *Blood*. 2008; 111(1):16-24.
6. Kaplan M, Hammerman C. Neonatal screening for glucose-6-phosphate dehydrogenase deficiency: biochemical versus genetic technologies. *Semin Perinatol*. 2011; 35(3):155-61.
7. Frank JE. Diagnosis and management of G6PD deficiency *Am Fam Physician*. 2005 Oct 1;72(7):1277-82.
8. Abo El Fotoh M, Rizk M: Prevalence of glucose-6-phosphate dehydrogenase deficiency in jaundiced Egyptian neonates. *J Matern Fetal Neonatal Med*. 2016 Dec;29(23):3834-7.
9. Abo Elella S, Tawfik M, Barseem N, and Moustafa W: Prevalence of glucose-6-phosphate dehydrogenase deficiency in neonates in Egypt. *Ann Saudi Med*. 2017; 37(5): 362-365.
10. La Rue N, Kahn M, Murray M, Leader BT, Bansil P, McGray S, Kalnoky M, Zhang H, Abo Elella S, Tawfik M, Barseem N, and Moustafa W: Prevalence of glucose-6-phosphate dehydrogenase deficiency in neonates in Egypt. *Ann Saudi Med*. 2017; 37(5): 362-365.
11. Glader B. Hereditary hemolytic anemias due to red blood cell enzyme disorders. In: Greer JP, Foerster J, Rodgers GM, et al., editors. *Wintrobe's Clinical Hematology*. 12th ed. Lippincott, Williams & Wilkins; Philadelphia: 2009; 933.
12. El-Sayed L, Tantawi H, Adly A & Farouk M: Prevention of Hemolytic Crisis among G6PD Children: Effect of Educational Program Intervention. *Journal of American Science* 2012;8(12)

13. El-Menshay A, Khalifa N, Awad S, Fathy M and. Amer A. Prevalence of Glucose-6-phosphate Dehydrogenase Deficiency in Jaundiced Neonates in Egypt. *Australian Journal of Basic and Applied Sciences*, 2009; 3(3): 2016-2023.
14. Frankool WM, Al-Tu'ma FJ. Molecular basis of G6PD deficiency in hyperbilirubinemic neonates in Middle Euphrates Province: Iraq. *Karbala J Med* 2010;3:98-102.
15. Karimi M, Martinez di Montemuros F, Danielli MG, et al. Molecular characterization of glucose-6-phosphate dehydrogenase deficiency in the Fars province of Iran. *Haematologica* 2003;88: 346-7.
16. Castro S, Weber R, Dadalt V, et al. Prevalence of G6PD deficiency in newborns in the south of Brazil. *J Med Screen* 2006;13:85-6.
17. Isa H, Mohamed M, Mohamed A, Abdulla A, Abdulla F: Neonatal indirect hyperbilirubinemia and glucose-6-phosphate dehydrogenase deficiency, *Korean J Pediatr.* 2017; 60(4): 106-111.
18. Badejoko BO, Owa JA, Oseni SBA, Badejoko O, Fatusi AO, Adejuyigbe EA. Early Neonatal Bilirubin, Hematocrit, and Glucose-6-Phosphate Dehydrogenase Status, *Pediatrics* 2014;134(4) e1082-1088
19. Sinha R, Sachendra B, Syed S, Nair L, John B. To study the prevalence of glucose 6 phosphate dehydrogenase(G6PD) deficiency in neonates with neonatal hyperbilirubinemia and to compare the course of the neonatal jaundice in deficient versus non deficient neonates.2017; 6(2) 71-74
20. Eghbalian E, Monsef A, Evaluation of Glucose-6-Phosphate Dehydrogenase Deficiency without Hemolysis in Icteric Newborns. *Iran J Pediatr.* 2007; 17( 1) Das M, Singh A. A comparative study of peak total serum bilirubin level in neonates with ABO incompatibility, Rh incompatibility and G6PD deficiency. *IOSR Journal of Dental and Medical Sciences (IOSR-JDMS).* 2018; 17 (10):21-23.
21. Garg s, Joag G. Assessment of the prevalence of G6PD deficiency in RBCs of live newborns born at tertiary care hospital. *International Journal of Contemporary Pediatrics Garg S et al. Int J Contemp Pediatr.* 2019; 6 (2):676-682.
22. Tsuzuki,S , Akahira-Azuma M, Kaneshige M, Shoya K , Hosokawa Sh, Kanno H, Matsushita T. A Japanese neonatal case of glucose-6-phosphate dehydrogenase deficiency presenting as severe jaundice and hemolytic anemia without apparent trigger, *Springerplus.* 2013; 2: 434
23. Valaes T. Severe neonatal jaundice associated with glucose-6- phosphate dehydrogenase deficiency: pathogenesis and globalepidemiology. *Acta Paediatr Suppl* 1994; 394:58-76.
24. Atay E, Bozaykut A, Ipek I: Glucose-6-phosphate Dehydrogenase Deficiency in Neonatal Indirect Hyperbilirubinemia. *Journal of Tropical Pediatrics.* 2006; 52, (1):56-58
25. Abu Salem M, O Mahrous O, El Shazly H, Ibrahim R, Al-oshari S Epidemiology of iron-deficiency anemia among pregnant women in menoufia governorate, Egypt and Taiz Governorate, Yemen: A comparative study). *MMJ.* 2016 ;29 (4) 1005-1011. DOI: 10.4103/1110-2098.202491.
26. Sinha R, Sachendra B, Sabid Syed V, Nair L, John BM. To study the prevalence of glucose 6 phosphate dehydrogenase (G6PD) deficiency in neonates with neonatal hyperbilirubinemia and to compare the course of the neonatal jaundice in deficient

- versus non deficient neonates. *Journal of Clinical Neonatology*. 2017; 6 ( 2 ) 71-74.  
DOI: 10.4103/jcn.JCN\_59\_16
27. Das M, Singh A. A comparative study of peak total serum bilirubin level in neonates with ABO incompatibility, Rh incompatibility and G6PD deficiency. *IOSR Journal of Dental and Medical Sciences (IOSR-JDMS)* :2018 ; 17, 10 ( 2 ) , 21-23.
  28. Hussain M, Irshad M, Kalim M, Ali L. Glucose-6-Phosphate Dehydrogenase Deficiency In Jaundiced Neonates .*JMPI*. 2010; 94(2): 122-196.
  29. Shah V, Yeo C. Identifying Risk of Neonatal Hyperbilirubinaemia and Early Discharge for Glucose-6-Phosphate Dehydrogenase Deficient Newborns in Singapore. *Ann Acad Med Singapore* 2007; 36: 1003-1009
  30. Aletayeb S, Dehdashtian M , Aramesh M, Arash M, Hedayati Z and Taher M. Outcome of Jaundice in neonates with ABO and Rh blood incompatibility and glucose-6-phosphate dehydrogenase deficiency: *Biomedical Research* 2017; 28 (8): 3440-3444
  31. Al-Joborae S. Extent of Knowledge of Mothers of Neonates with G6PD Deficiency in Hilla City. *Journal of Babylon University/ Pure and Applied Sciences*. 2015;23(4): 1542-1550
  32. Al Arrayed S, Al Hajeri A. Public Awareness of Glucose-6-Phosphate Dehydrogenase (G6PD) Deficiency. *Bahrain Medical Bulletin*, 2011;33: (3), available at: [https://www.researchgate.net/publication/301640243\\_Public\\_Awareness\\_of\\_Glucose-6-Phosphate\\_Dehydrogenase\\_Deficiency\\_in\\_Sokoto](https://www.researchgate.net/publication/301640243_Public_Awareness_of_Glucose-6-Phosphate_Dehydrogenase_Deficiency_in_Sokoto)
  33. Almuahini MS, Alruzayhi MK, Alwassel AI, Alateeq OM: Public Awareness of Glucose-6-Phosphate Dehydrogenase (G6PD) Deficiency Causes and Prevalence Factors: *The Journal of Middle East and North Africa Sciences* 2018; 4(2) available at: <http://oaji.net/pdf.html?n=2017/2705-1517398879.pdf>
  34. Magfour H, Aqeel A, Maashi A, Maghfuri N, Jarad R, Kathiah AA, Abdu DA, Almudeer A. Mothers' perception of neonatal jaundice in Jazan Region, KSA. *J Clin Neonatol* 2019; 8:116-9
  35. Aggarwal B, Agrawal A, Chaudhary P, Gupta G, Rana S, Gupta S. Neonatal Jaundice: Knowledge, attitude beliefs, and practices of postnatal mothers in a tertiary care hospital in Uttarakhand, India. *Indian J Child Health*.2017; 4(4):603-608.
  36. Boo N, Gan C, Gian Y, Lim K, Lim M, Krishna-Kumar H. Malaysian Mothers' Knowledge & Practices on Care of Neonatal Jaundice. *Med J Malaysia*. 2011; 66(3):239-43.
  37. Goodman O, Kehinde O, Odugbemi B, Femi-Adebayo T, Odusanya O. Neonatal Jaundice: Knowledge, Attitude and practices of mothers in Mosan-Okunola community, Lagos, Nigeria.2015;22(3): 158-163.
  38. Alfouwais N, Seada L, Alahmadi R, Alassiri A. Assessment of Knowledge, Attitude and Practice of Saudi Parents towards Neonatal Jaundice (NNJ): *The Egyptian Journal of Hospital Medicine*. 2018; 70 (9):1686-1694
  39. Allahony DM, Hegazy NN, Kasemy ZA, Bahgat EM. Mothers' perception toward neonatal jaundice in Kafr El-batanoon village, Menoufia, Egypt. *Menoufia Medical Journal* 2016; 29:743-748

- 1  
2  
3 40. Saadat SH, Naderi S, Zare S, Khalili S, Darban B, Goodarzi R. Epidemiologic Study of  
4 Jaundice in Newborns with Jaundice in the First 24 hours of Birth in Children's  
5 Hospital and Shariati Hospital of Bandar Abbas in 2010-2014. Journal of Research  
6 in Medical and Dental Science 2018; 6( 1): 113-117  
7  
8 41. Rabiyeepoor S, Gheibi Sh, Jafari S. To Study the Knowledge and Attitude of  
9 Postnatal Mothers on Neonatal Jaundice in Motahari Hospital, Iran. Clinical  
10 Medicine Research 2014; 3(1): 1-5  
11  
12

13 **Legend of figure:**

14  
15 Fig 1: Prevalence of G6PD deficiency among the studied jaundiced neonate group

16  
17 Fig 2: Correlation between G6PD and Jaundice time of onset in deficient cases

18  
19 Fig 3: Total bilirubin distribution among patients with G6PD deficiency, RH incompatibility and  
20 ABO incompatibility  
21  
22

23 Fig 4: Perception of G6PD deficiency and neonatal jaundice among the studied mothers  
24  
25  
26  
27  
28  
29  
30  
31  
32  
33  
34  
35  
36  
37  
38  
39  
40  
41  
42  
43  
44  
45  
46  
47  
48  
49  
50  
51  
52  
53  
54  
55  
56  
57  
58  
59  
60



**Table 1: General characteristics of the studied mothers and jaundiced neonates:**

| General characteristics                                              | Study group<br>(n=487) |             |
|----------------------------------------------------------------------|------------------------|-------------|
| <b>Mothers' characteristics</b>                                      |                        |             |
| Age (Y) (Mean $\pm$ SD, range)                                       | 31.45 $\pm$ 4.77       | 22-39       |
| Gestational age(week) (Mean $\pm$ SD, range)                         | 37.71 $\pm$ 1.05       | 37-41       |
| BMI(kg/m <sup>2</sup> ) (Mean $\pm$ SD, range)                       | 22.02 $\pm$ 2.37       | 18.30-27.10 |
| <b>Gravidity no,%</b>                                                |                        |             |
| $\leq 3$                                                             | 292                    | 60.0        |
| $>3$                                                                 | 195                    | 40.0        |
| <b>Parity no,%</b>                                                   |                        |             |
| $\leq 2$                                                             | 252                    | 51.7        |
| $>2$                                                                 | 235                    | 48.3        |
| <b>Neonatal characteristics</b>                                      |                        |             |
| <b>Sex: no,%</b>                                                     |                        |             |
| Male                                                                 | 339                    | 69.6        |
| Female                                                               | 148                    | 30.4        |
| Birth weight (kg) (Mean $\pm$ SD, range)                             | 2.60 $\pm$ 0.29        | 2.30-3.50   |
| Age of neonate(days) (Mean $\pm$ SD, range)                          | 4.45 $\pm$ 0.86        | 3-8         |
| <b>Bilirubin(mg/dl) (Mean <math>\pm</math>SD, range)</b>             |                        |             |
| • Total                                                              | 15.17 $\pm$ 5.14       | 7.30-25.50  |
| • Direct                                                             | 1.08 $\pm$ 0.38        | 1.50-0.50   |
| • Indirect                                                           | 13.17 $\pm$ 3.74       | 6.40-23.15  |
| Hb (gm/dl) (Mean $\pm$ SD, range)                                    | 12.18 $\pm$ 1.75       | 9.50-14.50  |
| Reticulocyte count (%)(Mean $\pm$ SD, range)                         | 3.38 $\pm$ 1.30        | 1.40-6.0    |
| Age of onset of jaundice (Maternal recall)<br>(Mean $\pm$ SD, range) | 3.45 $\pm$ 0.85        | 2-7         |
| Need for Phototherapy on admission (no,%)                            | 5                      | 0.20        |
| +ve Family history of G6PD (no,%)                                    | 144                    | 29.6        |
| +ve Consanguinity (no,%)                                             | 103                    | 21.1        |
| ABO incompatibility                                                  | 63                     | 12.9        |
| Rh incompatibility                                                   | 47                     | 9.7         |

**Table 2: Distribution of the studied G6PD groups regarding bilirubin, neonate sex, family history and consanguinity:**

|                                          | G6PD                            |      |                                |      | Test sig                   | of P value        | OR<br>CI 95%             |
|------------------------------------------|---------------------------------|------|--------------------------------|------|----------------------------|-------------------|--------------------------|
|                                          | Deficient<br>No.=49<br>mean ±SD |      | Normal<br>No. =438<br>mean ±SD |      |                            |                   |                          |
| <b>Bilirubin(mg/dl)</b>                  |                                 |      |                                |      |                            |                   |                          |
| • <b>Total</b>                           | 23.03 ±2.94                     |      | 14.30 ±4.55                    |      | <b>t=18.40</b>             | <b>&lt;0.001*</b> | -                        |
| • <b>Direct</b>                          | 1.38 ±0.14                      |      | 1.02 ±0.41                     |      | <b>t=12.47</b>             | <b>&lt;0.001*</b> |                          |
| • <b>Indirect</b>                        | 17.02 ±3.45                     |      | 12.74 ±3.52                    |      | <b>t=8.21</b>              | <b>&lt;0.001</b>  |                          |
| <b>Neonate Sex</b>                       | no                              | %    | no                             | %    | <b>χ<sup>2</sup>=10.49</b> | <b>0.001*</b>     | <b>4.27(1.66-10.99)</b>  |
| Male                                     | 42                              | 85.7 | 297                            | 45.0 |                            |                   |                          |
| Female                                   | 7                               | 14.3 | 141                            | 55.0 |                            |                   |                          |
| <b>Family history of G6PD deficiency</b> |                                 |      |                                |      | <b>χ<sup>2</sup>=55.21</b> | <b>&lt;0.001*</b> | <b>9.54(4.80-18.95)</b>  |
| +ve                                      | 37                              | 75.5 | 107                            | 24.4 |                            |                   |                          |
| -ve                                      | 12                              | 24.5 | 331                            | 75.6 |                            |                   |                          |
| <b>Consanguinity</b>                     |                                 |      |                                |      | <b>χ<sup>2</sup>=69.72</b> | <b>&lt;0.001*</b> | <b>10.21(5.39-19.33)</b> |
| +ve                                      | 33                              | 67.3 | 70                             | 16.0 |                            |                   |                          |
| -ve                                      | 16                              | 32.7 | 368                            | 84.0 |                            |                   |                          |

**\*Significant, family history: not in the current family but in their relatives**

**Table 3: Knowledge, attitude and practice of the studied mothers regarding G6PD deficiency:**

|                                                                                        |              | No.=487   |          |                                                                 |              |
|----------------------------------------------------------------------------------------|--------------|-----------|----------|-----------------------------------------------------------------|--------------|
| <b>Knowledge</b>                                                                       |              | <b>no</b> | <b>%</b> | <b>no</b>                                                       | <b>%</b>     |
| <b>Hearing about G6PD deficiency (per say)</b>                                         |              |           |          | <b>Dizziness</b>                                                |              |
| -                                                                                      | Yes          | 2         | 4.1      | •                                                               | Yes          |
| -                                                                                      | No           | 485       | 95.9     | •                                                               | No           |
| <b>Hearing about fava bean anemia (G6PD Deficiency)</b>                                |              |           |          | •                                                               | I don't know |
| •                                                                                      | Yes          | 112       | 23.0     | <b>Shortness of breath</b>                                      |              |
| •                                                                                      | No           | 375       | 76.0     | •                                                               | Yes          |
| <b>G6PD deficiency is a blood disease</b>                                              |              |           |          | •                                                               | No           |
| -                                                                                      | Yes          | 100       | 89.3     | I don't know                                                    |              |
| -                                                                                      | No           | 12        | 10.7     | <b>G6PD is a cause of Jaundice</b>                              |              |
| -                                                                                      | I don't know | 0         | 0.0      | •                                                               | Yes          |
| <b>Is it a hereditary disease:</b>                                                     |              |           |          | •                                                               | No           |
| •                                                                                      | Yes          | 105       | 93.8     | •                                                               | I don't know |
| •                                                                                      | No           | 5         | 4.5      | <b>Attitude</b>                                                 |              |
| •                                                                                      | I don't know | 2         | 1.8      | <b>no</b>                                                       | <b>%</b>     |
| <b>Both parents have to be carriers for G6PD deficiency to have an affected child?</b> |              |           |          | <b>Is this a serious problem</b>                                |              |
| -                                                                                      | Yes          | 5         | 4.5      | -                                                               | Yes          |
| -                                                                                      | No           | 1         | 0.9      | -                                                               | No           |
| -                                                                                      | I don't know | 101       | 90.2     | -                                                               | I don't know |
| <b>The inheritance of G6PD deficiency related to the baby's gender?</b>                |              |           |          | <b>Consanguinity is the cause of the disease</b>                |              |
| -                                                                                      | Yes          | 10        | 8.9      | -                                                               | Yes          |
| -                                                                                      | No           | 3         | 2.7      | -                                                               | No           |
| -                                                                                      | I don't know | 99        | 88.4     | I don't know                                                    |              |
| <b>Knowing whether personally you may have a G6PD deficiency child</b>                 |              |           |          | <b>Next pregnancy should be prevented:</b>                      |              |
| -                                                                                      | Yes          | 8         | 7.1      | -                                                               | Yes          |
| -                                                                                      | No           | 85        | 75.9     | -                                                               | No           |
| -                                                                                      | I don't know | 29        | 25.9     | -                                                               | I don't know |
| <b>There should be a family history of G6PD deficiency to result</b>                   |              |           |          | <b>Follow-up of the diseased child should continue for life</b> |              |
| -                                                                                      | Yes          | 75        | 67.0     | -                                                               | Yes          |
| -                                                                                      | No           | 15        | 13.4     | -                                                               | No           |
| -                                                                                      | I don't know | 62        | 55.4     | -                                                               | I don't know |
| <b>Some medications Can trigger an attack of G6PD deficiency</b>                       |              |           |          | <b>Practice</b>                                                 |              |
| •                                                                                      | Yes          | 44        | 39.3     | <b>no</b>                                                       | <b>%</b>     |
| •                                                                                      | No           | 10        | 8.9      | <b>Have you been subjected to premarital counseling</b>         |              |
| •                                                                                      | I don't know | 58        | 51.8     | -                                                               | Yes          |
| <b>Symptoms of G6PD attack:</b>                                                        |              |           |          | -                                                               | No           |
| <b>Pallor</b>                                                                          |              |           |          | <b>Have you been subjected to genetic screening</b>             |              |
| •                                                                                      | Yes          | 10        | 8.9      | -                                                               | Yes          |
| •                                                                                      | No           | 52        | 46.4     | -                                                               | No           |
| •                                                                                      | I don't know | 60        | 53.8     | -                                                               | I don't know |
| <b>Nausea, vomiting, anorexia and diarrhea</b>                                         |              |           |          | <b>Seeking medical advice after delivery to be assured</b>      |              |
| •                                                                                      | Yes          | 15        | 13.4     | -                                                               | Yes          |
| •                                                                                      | No           | 45        | 40.2     | -                                                               | No           |
| •                                                                                      | I don't know | 52        | 46.4     |                                                                 |              |

**Table 4: Knowledge, attitude and practice of the studied mothers regarding NNJ:**

| <b>No.=487</b>                             |           |          |                                                               |           |          |
|--------------------------------------------|-----------|----------|---------------------------------------------------------------|-----------|----------|
| <b>Knowledge</b>                           | <b>no</b> | <b>%</b> | <b>Attitude</b>                                               | <b>no</b> | <b>%</b> |
| <b>Hearing of NNJ</b>                      |           |          | NNJ is a worrisome condition?                                 |           |          |
| Yes                                        | 487       | 100.0    | - Yes                                                         | 248       | 50.9     |
| No                                         | 0         | 0.0      | - No                                                          | 200       | 41.1     |
| <b>Site to detect NNJ</b>                  |           |          | - I don't know                                                | 39        | 8.0      |
| Skin                                       | 334       | 68.6     | Phototherapy is the best way in treatment                     |           |          |
| Eye                                        | 123       | 25.2     | - Yes                                                         | 409       | 84       |
| Tongue                                     | 30        | 6.2      | - No                                                          | 8         | 1.6      |
| <b>Causes</b>                              |           |          | - I don't know                                                | 70        | 14.4     |
| Prematurity                                | 341       | 70.0     | Blood exchange transfusion is the best way of management      | 107       | 22       |
| ABO disparity between mother and baby      | 73        | 15.0     | - Yes                                                         | 50        | 10.3     |
| Breastfeeding                              | 146       | 30.0     | - No                                                          | 330       | 67.7     |
| Infection                                  | 139       | 33.0     | - I don't know                                                |           |          |
| Hemolysis                                  | 194       | 39.8     | Is it important seeking medical advice                        |           |          |
| Dehydration                                | 170       | 34.9     | - Yes                                                         | 450       | 92.4     |
| Increased U/S examination during pregnancy | 292       | 60.0     | - No                                                          | 20        | 4.1      |
| Diabetic mothers                           | 73        | 15.0     | - I don't know                                                | 18        | 13.5     |
| Others                                     | 141       | 28.9     |                                                               |           |          |
| <b>Complications</b>                       |           |          |                                                               |           |          |
| Death                                      | 146       | 30.0     | <b>Practice</b>                                               | <b>no</b> | <b>%</b> |
| Cerebral palsy                             | 112       | 23.0     | <b>Seeking quickly medical advice if having baby with NNJ</b> |           |          |
| Mental retardation                         | 170       | 34.9     | - Yes                                                         | 477       | 95.9     |
| Handicapping                               | 112       | 23.0     | - No                                                          | 10        | 4.1      |
| Hearing loss                               | 30        | 6.2      | - I don't know                                                | 0         | 0.0      |
| <b>Methods of treatment</b>                |           |          | <b>Causes of denial of medical care :</b>                     |           |          |
| Phototherapy                               | 461       | 94.7     | - Afraid of hospitalization.                                  | 6         | 60.0     |
| Blood exchange transfusion                 | 146       | 30.0     | - Admission/ investigation not required.                      | 1         | 10.0     |
| Drugs                                      | 399       | 82.0     | - High cost of medical care.                                  | 2         | 20.0     |
| Neon lamp                                  | 364       | 74.7     | - Lack of transportation.                                     | 0         | 0.0      |
| Increase breastfeeding                     | 238       | 48.9     | - Long hours to reach hospital.                               | 0         | 0.0      |
|                                            |           |          | <b>Time of seeking medical advice</b>                         |           |          |
|                                            |           |          | - Within 24-48 h                                              | 136       | 28.5     |
|                                            |           |          | - >48 h                                                       | 341       | 71.5     |
|                                            |           |          | <b>Continuation of breastfeeding</b>                          |           |          |
|                                            |           |          | - Yes                                                         | 448       | 92.0     |
|                                            |           |          | - No                                                          | 39        | 8.0      |

1  
2  
3  
4  
5  
6  
7  
8  
9  
10  
11  
12  
13  
14  
15  
16  
17  
18  
19  
20  
21  
22  
23  
24  
25  
26  
27  
28  
29  
30  
31  
32  
33  
34  
35  
36  
37  
38  
39  
40  
41  
42  
43  
44  
45  
46  
47  
48  
49  
50  
51  
52  
53  
54  
55  
56  
57  
58  
59  
60

~~Copyright 2019, BMJ Group, 100 Brookings Drive, Suite 900, Boston, MA 02148, USA. All rights reserved. No part of this publication may be reproduced, stored in a retrieval system, or transmitted, in any form or by any means, without the prior written permission of the publisher.~~

For peer review only

1  
2  
3  
4  
5  
6  
7  
8  
9  
10  
11  
12  
13  
14  
15  
16  
17  
18  
19  
20  
21  
22  
23  
24  
25  
26  
27  
28  
29  
30  
31  
32  
33  
34  
35  
36  
37  
38  
39  
40  
41  
42  
43  
44  
45  
46  
47  
48  
49  
50  
51  
52  
53  
54  
55  
56  
57  
58  
59  
60

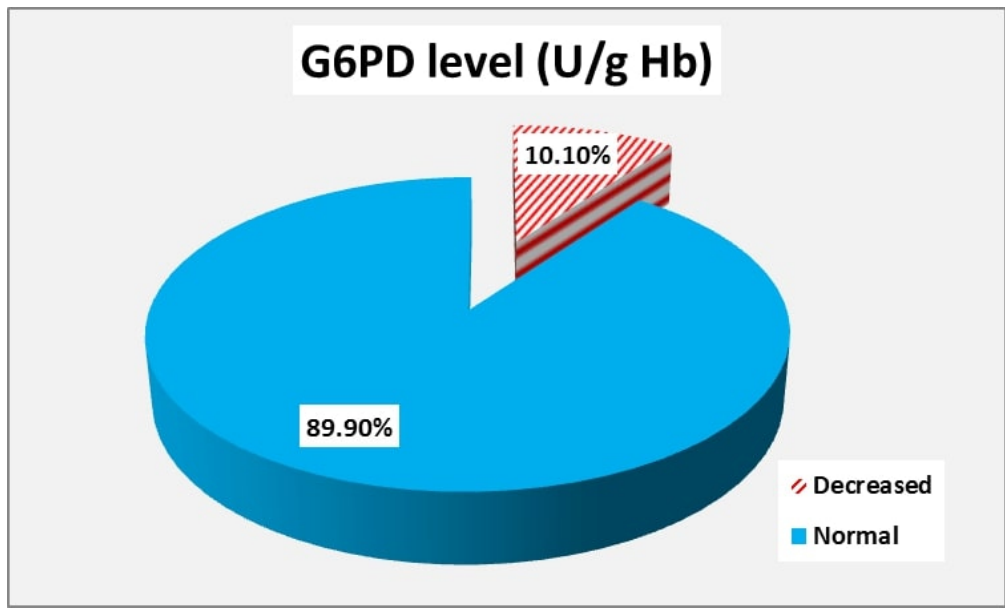

Fig 1: Prevalence of G6PD deficiency among the studied jaundiced neonate group  
63x38mm (300 x 300 DPI)

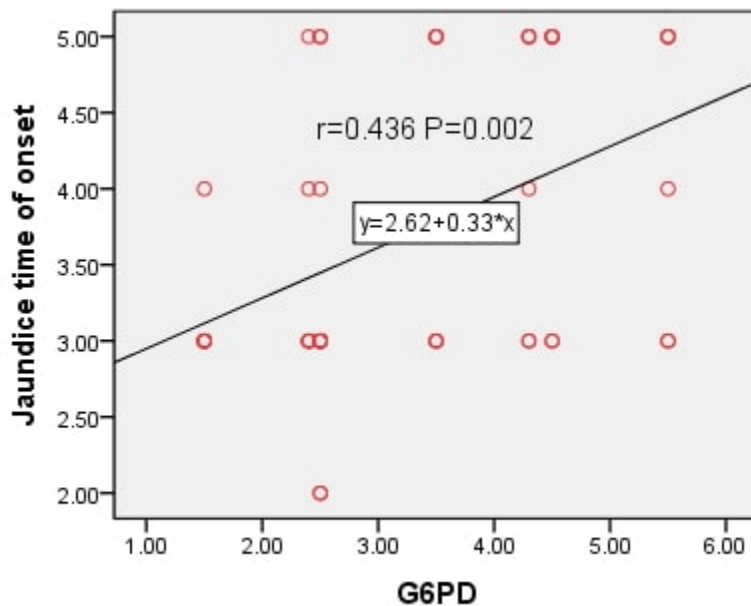

Fig 2: Correlation between G6PD and Jaundice time of onset in deficient cases

33x26mm (300 x 300 DPI)

1  
2  
3  
4  
5  
6  
7  
8  
9  
10  
11  
12  
13  
14  
15  
16  
17  
18  
19  
20  
21  
22  
23  
24  
25  
26  
27  
28  
29  
30  
31  
32  
33  
34  
35  
36  
37  
38  
39  
40  
41  
42  
43  
44  
45  
46  
47  
48  
49  
50  
51  
52  
53  
54  
55  
56  
57  
58  
59  
60

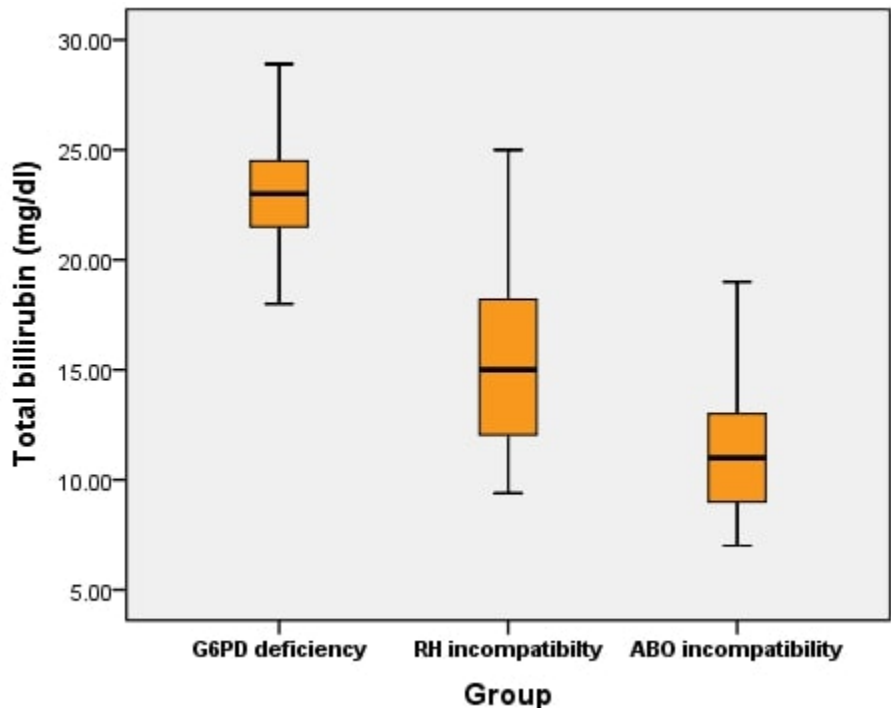

Fig 3: Total bilirubin distribution among patients with G6PD deficiency, RH incompatibility and ABO incompatibility

38x31mm (300 x 300 DPI)



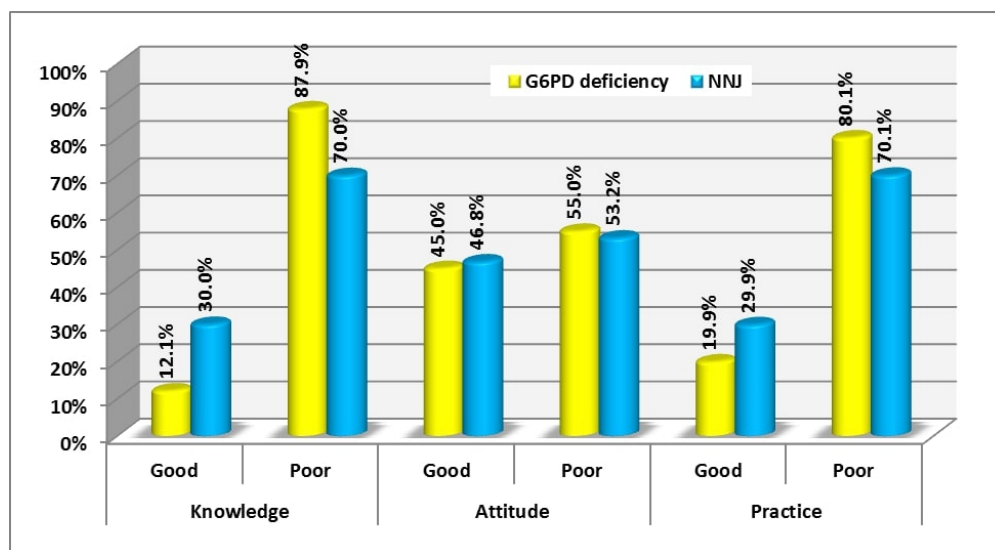

Fig 4: Knowledge, attitude and practice of G6PD deficiency and neonatal jaundice among the studied mothers

82x45mm (300 x 300 DPI)

# Questionnaire for assessing Prevalence and Mothers' knowledge, attitude and practice of G6PD Deficiency among Jaundiced Neonates

## Mothers' characteristics

Age (Y): Gestational age(week): Wight (cm): Height (kg):  
 Gravidity: Parity:

## Neonatal characteristics

Sex: Male Female

Birth weight (kg): Age of neonate(days): Age of onset of jaundice:

Need for Phototherapy on admission +ve -ve

Family history of G6PD deficiency +ve -ve

Consanguinity +ve -ve

## Lab investigation:

Bilirubin(mg/dl)

- Total
- Direct
- Indirect

- Hb (gm/dl)
- Reticulocyte count
- ABO incompatibility
- Rh incompatibility

G6PD (u/g Hb):

## Knowledge, attitude and practice of the studied mothers regarding G6PD deficiency:

- Have you heard about G6PD deficiency (Per say)?
  - Yes
  - No
- Have you heard about fava bean anemia (G6PD deficiency)?
  - Yes
  - No
- Is fava bean anemia (G6PD deficiency) a blood disease?
  - Yes
  - No
  - I don't know
- Is it a hereditary disease:
  - Yes
  - No
  - I don't know
- Do both parents have to be carriers for fava bean anemia (G6PD deficiency) to get an affected child?
  - Yes
  - No
  - I don't know
- Is the inheritance related to the baby's gender?
  - Yes
  - No
  - I don't know
- Do you know whether personally you may have a fava bean anemia (G6PD deficiency) child?
  - Yes
  - No
  - I don't know
- Is the family history of fava bean anemia (G6PD deficiency) a condition for occurrence of the disease?
  - Yes
  - No
  - I don't know
- Can some medications trigger an attack of fava bean anemia (G6PD deficiency)?
  - Yes
  - No
  - I don't know
- Is pallor a symptom of fava bean anemia (G6PD deficiency) attack?
  - Yes

-No

-I don't know

- **May nausea, vomiting, anorexia and diarrhea be symptoms of fava bean anemia (G6PD deficiency) attack?**

-Yes

-No

-I don't know

- **May dizziness be a symptom of fava bean anemia (G6PD deficiency) attack?**

- Yes

- No

- I don't know

- **May shortness of breath be a symptom of fava bean anemia (G6PD deficiency) attack?**

- Yes

- No

- I don't know

- **Is fava bean anemia (G6PD deficiency) a cause of Jaundice?**

- Yes

- No

- I don't know

### Attitude

- **Is fava bean anemia (G6PD deficiency) a serious problem?**

- Yes

- No

- I don't know

- **Is consanguinity a cause of the disease?**

- Yes

- No

- I don't know

- **Should next pregnancy be prevented if there is one child has the disease within the family?**

- Yes

- No

- I don't know

- **Should follow-up of the diseased child continue for life?**

- Yes

- No

- I don't know

### Practice

- **Have you been subjected to premarital counseling?**

- Yes

- No

- **Have you been subjected to genetic screening?**

- Yes

- No

- I don't know

- **Do you seek medical advice after delivery to be assured?**

- Yes

- No

### Knowledge, attitude and practice of the studied mothers regarding NNJ:

- **Have you heard about neonatal jaundice?** Yes No

- **What are sites of detection of neonatal jaundice?**

- Skin

- Eye

- Tongue

- **What are causes of neonatal jaundice?**

- Prematurity

- ABO disparity between mother and baby

- Breastfeeding
- Infection
- Hemolysis
- Dehydration
- Increased U/S examination during pregnancy
- Diabetic mothers
- Others
- **What are complications of neonatal jaundice?**
- Death
- Cerebral palsy
- Mental retardation
- Handicapping
- Hearing loss
- **What are methods of treatment of neonatal jaundice?**
- Phototherapy
- Blood exchange transfusion
- Drugs
- Neon lamp
- Increase breastfeeding

### Attitude

- **Is neonatal jaundice a worrisome condition?**
- Yes
- No
- I don't know
- **Is phototherapy the best way in treatment?**
- Yes
- No
- I don't know
- **Is blood exchange transfusion the best way of management?**
- Yes
- No
- I don't know
- **Is it important seeking medical advice?**
- Yes
- No
- I don't know

### Practice

- **Do you seek a medical advice quickly if having baby with NNJ**
- Yes
- No
- I don't know
- **If no why?**
- Afraid of hospitalization.
- Admission/ investigation not required.
- High cost of medical care.
- Lack of transportation.
- Long hours to reach hospital.
- **When do you seek a medical advice?**
- Within 24-48 h
- >48h
- **Will you continue breastfeeding?**
- Yes
- No

**STROBE 2007 (v4) checklist of items to be included in reports of observational studies in epidemiology\***  
**Checklist for cohort, case-control, and cross-sectional studies (combined)**

| Section/Topic             | Item # | Recommendation                                                                                                                                                                                                                                                                                                                                                                                                                                                         | Reported on page # |
|---------------------------|--------|------------------------------------------------------------------------------------------------------------------------------------------------------------------------------------------------------------------------------------------------------------------------------------------------------------------------------------------------------------------------------------------------------------------------------------------------------------------------|--------------------|
| Title and abstract        | 1      | (a) Indicate the study's design with a commonly used term in the title or the abstract                                                                                                                                                                                                                                                                                                                                                                                 | 1                  |
|                           |        | (b) Provide in the abstract an informative and balanced summary of what was done and what was found                                                                                                                                                                                                                                                                                                                                                                    | 2                  |
| <b>Introduction</b>       |        |                                                                                                                                                                                                                                                                                                                                                                                                                                                                        |                    |
| Background/rationale      | 2      | Explain the scientific background and rationale for the investigation being reported                                                                                                                                                                                                                                                                                                                                                                                   | 3                  |
| Objectives                | 3      | State specific objectives, including any pre-specified hypotheses                                                                                                                                                                                                                                                                                                                                                                                                      | 3                  |
| <b>Methods</b>            |        |                                                                                                                                                                                                                                                                                                                                                                                                                                                                        |                    |
| Study design              | 4      | Present key elements of study design early in the paper                                                                                                                                                                                                                                                                                                                                                                                                                | 3                  |
| Setting                   | 5      | Describe the setting, locations, and relevant dates, including periods of recruitment, exposure, follow-up, and data collection                                                                                                                                                                                                                                                                                                                                        | 4                  |
| Participants              | 6      | (a) <i>Cohort study</i> —Give the eligibility criteria, and the sources and methods of selection of participants. Describe methods of follow-up<br><i>Case-control study</i> —Give the eligibility criteria, and the sources and methods of case ascertainment and control selection. Give the rationale for the choice of cases and controls<br><i>Cross-sectional study</i> —Give the eligibility criteria, and the sources and methods of selection of participants | 4                  |
|                           |        | (b) <i>Cohort study</i> —For matched studies, give matching criteria and number of exposed and unexposed<br><i>Case-control study</i> —For matched studies, give matching criteria and the number of controls per case                                                                                                                                                                                                                                                 |                    |
| Variables                 | 7      | Clearly define all outcomes, exposures, predictors, potential confounders, and effect modifiers. Give diagnostic criteria, if applicable                                                                                                                                                                                                                                                                                                                               | 4-5                |
| Data sources/ measurement | 8*     | For each variable of interest, give sources of data and details of methods of assessment (measurement). Describe comparability of assessment methods if there is more than one group                                                                                                                                                                                                                                                                                   | 4-5                |
| Bias                      | 9      | Describe any efforts to address potential sources of bias                                                                                                                                                                                                                                                                                                                                                                                                              | 10                 |
| Study size                | 10     | Explain how the study size was arrived at                                                                                                                                                                                                                                                                                                                                                                                                                              | 5                  |
| Quantitative variables    | 11     | Explain how quantitative variables were handled in the analyses. If applicable, describe which groupings were chosen and why                                                                                                                                                                                                                                                                                                                                           | 5                  |
| Statistical methods       | 12     | (a) Describe all statistical methods, including those used to control for confounding                                                                                                                                                                                                                                                                                                                                                                                  | 5                  |
|                           |        | (b) Describe any methods used to examine subgroups and interactions                                                                                                                                                                                                                                                                                                                                                                                                    | 5                  |
|                           |        | (c) Explain how missing data were addressed                                                                                                                                                                                                                                                                                                                                                                                                                            | -                  |
|                           |        | (d) <i>Cohort study</i> —If applicable, explain how loss to follow-up was addressed<br><i>Case-control study</i> —If applicable, explain how matching of cases and controls was addressed                                                                                                                                                                                                                                                                              | -                  |

|                          |     |                                                                                                                                                                                                                                                                                                                                                                                                               |               |
|--------------------------|-----|---------------------------------------------------------------------------------------------------------------------------------------------------------------------------------------------------------------------------------------------------------------------------------------------------------------------------------------------------------------------------------------------------------------|---------------|
|                          |     | <i>Cross-sectional study</i> —If applicable, describe analytical methods taking account of sampling strategy                                                                                                                                                                                                                                                                                                  |               |
|                          |     | (e) Describe any sensitivity analyses                                                                                                                                                                                                                                                                                                                                                                         |               |
| <b>Results</b>           |     |                                                                                                                                                                                                                                                                                                                                                                                                               |               |
| Participants             | 13* | (a) Report numbers of individuals at each stage of study—eg numbers potentially eligible, examined for eligibility, confirmed eligible, included in the study, completing follow-up, and analysed<br>(b) Give reasons for non-participation at each stage<br>(c) Consider use of a flow diagram                                                                                                               | 6             |
| Descriptive data         | 14* | (a) Give characteristics of study participants (eg demographic, clinical, social) and information on exposures and potential confounders<br>(b) Indicate number of participants with missing data for each variable of interest<br>(c) <i>Cohort study</i> —Summarise follow-up time (eg, average and total amount)                                                                                           | 5-6<br>-<br>- |
| Outcome data             | 15* | <i>Cohort study</i> —Report numbers of outcome events or summary measures over time<br><i>Case-control study</i> —Report numbers in each exposure category, or summary measures of exposure<br><i>Cross-sectional study</i> —Report numbers of outcome events or summary measures                                                                                                                             | -<br>-<br>-   |
| Main results             | 16  | (a) Give unadjusted estimates and, if applicable, confounder-adjusted estimates and their precision (eg, 95% confidence interval). Make clear which confounders were adjusted for and why they were included<br>(b) Report category boundaries when continuous variables were categorized<br>(c) If relevant, consider translating estimates of relative risk into absolute risk for a meaningful time period | -<br>-<br>-   |
| Other analyses           | 17  | Report other analyses done—eg analyses of subgroups and interactions, and sensitivity analyses                                                                                                                                                                                                                                                                                                                |               |
| <b>Discussion</b>        |     |                                                                                                                                                                                                                                                                                                                                                                                                               |               |
| Key results              | 18  | Summarise key results with reference to study objectives                                                                                                                                                                                                                                                                                                                                                      | 7             |
| Limitations              | 19  | Discuss limitations of the study, taking into account sources of potential bias or imprecision. Discuss both direction and magnitude of any potential bias                                                                                                                                                                                                                                                    | -             |
| Interpretation           | 20  | Give a cautious overall interpretation of results considering objectives, limitations, multiplicity of analyses, results from similar studies, and other relevant evidence                                                                                                                                                                                                                                    | 7-8-9         |
| Generalisability         | 21  | Discuss the generalisability (external validity) of the study results                                                                                                                                                                                                                                                                                                                                         | 9-10          |
| <b>Other information</b> |     |                                                                                                                                                                                                                                                                                                                                                                                                               |               |
| Funding                  | 22  | Give the source of funding and the role of the funders for the present study and, if applicable, for the original study on which the present article is based                                                                                                                                                                                                                                                 | 1             |

\*Give information separately for cases and controls in case-control studies and, if applicable, for exposed and unexposed groups in cohort and cross-sectional studies.

**Note:** An Explanation and Elaboration article discusses each checklist item and gives methodological background and published examples of transparent reporting. The STROBE checklist is best used in conjunction with this article (freely available on the Web sites of PLoS Medicine at <http://www.plosmedicine.org/>, Annals of Internal Medicine at <http://www.annals.org/>, and Epidemiology at <http://www.epidem.com/>). Information on the STROBE Initiative is available at [www.strobe-statement.org](http://www.strobe-statement.org).

# BMJ Open

## Prevalence and Mothers' Knowledge, Attitude and practice of Glucose-6-Phosphate Dehydrogenase Deficiency among Jaundiced Neonates: A cross-sectional study

|                                 |                                                                                                                                                                                                                                                                                                                                                         |
|---------------------------------|---------------------------------------------------------------------------------------------------------------------------------------------------------------------------------------------------------------------------------------------------------------------------------------------------------------------------------------------------------|
| Journal:                        | <i>BMJ Open</i>                                                                                                                                                                                                                                                                                                                                         |
| Manuscript ID                   | bmjopen-2019-034079.R2                                                                                                                                                                                                                                                                                                                                  |
| Article Type:                   | Original research                                                                                                                                                                                                                                                                                                                                       |
| Date Submitted by the Author:   | 16-Dec-2019                                                                                                                                                                                                                                                                                                                                             |
| Complete List of Authors:       | Kasemy, Zeinab; Public Health and Community Medicine; Menoufia University Faculty of Medicine, Public Health and Community Medicine Bahbah, Wael; Menoufia University Faculty of Medicine, Pediatrics El Hefnawy, Sally; Menoufia University Faculty of Medicine, Biochemistry Alkalash, Safa; Menoufia University Faculty of Medicine, Family medicine |
| <b>Primary Subject Heading</b>: | Public health                                                                                                                                                                                                                                                                                                                                           |
| Secondary Subject Heading:      | Paediatrics                                                                                                                                                                                                                                                                                                                                             |
| Keywords:                       | Epidemiology < TROPICAL MEDICINE, Public health < INFECTIOUS DISEASES, Community child health < PAEDIATRICS, Family medicine, G6PD                                                                                                                                                                                                                      |
|                                 |                                                                                                                                                                                                                                                                                                                                                         |

SCHOLARONE™  
Manuscripts



I, the Submitting Author has the right to grant and does grant on behalf of all authors of the Work (as defined in the below author licence), an exclusive licence and/or a non-exclusive licence for contributions from authors who are: i) UK Crown employees; ii) where BMJ has agreed a CC-BY licence shall apply, and/or iii) in accordance with the terms applicable for US Federal Government officers or employees acting as part of their official duties; on a worldwide, perpetual, irrevocable, royalty-free basis to BMJ Publishing Group Ltd ("BMJ") its licensees and where the relevant Journal is co-owned by BMJ to the co-owners of the Journal, to publish the Work in this journal and any other BMJ products and to exploit all rights, as set out in our [licence](#).

The Submitting Author accepts and understands that any supply made under these terms is made by BMJ to the Submitting Author unless you are acting as an employee on behalf of your employer or a postgraduate student of an affiliated institution which is paying any applicable article publishing charge ("APC") for Open Access articles. Where the Submitting Author wishes to make the Work available on an Open Access basis (and intends to pay the relevant APC), the terms of reuse of such Open Access shall be governed by a Creative Commons licence – details of these licences and which [Creative Commons](#) licence will apply to this Work are set out in our licence referred to above.

Other than as permitted in any relevant BMJ Author's Self Archiving Policies, I confirm this Work has not been accepted for publication elsewhere, is not being considered for publication elsewhere and does not duplicate material already published. I confirm all authors consent to publication of this Work and authorise the granting of this licence.



# Prevalence and Mothers' Knowledge, Attitude and practice of Glucose-6-Phosphate Dehydrogenase Deficiency among Jaundiced Neonates: A Cross-sectional study

Running title: G6PD deficiency among Jaundiced Neonates

Zeinab A. Kasemy<sup>1</sup>, Wael A. Bahbah<sup>2</sup> Sally M. El Hefnawy<sup>3</sup>, Safa H. AlKalash<sup>4</sup>

**1**Public health and community medicine department, Menoufia faculty of medicine, Egypt

**2**Pediatrics department, Menoufia faculty of medicine, Egypt

**3**Biochemistry department, Menoufia faculty of medicine, Egypt

**4**Family medicine department, Menoufia faculty of medicine, Egypt

**Corresponding author:**

**Zeinab Abdel Aziz Kasemy**

**Tel: +201068787807**

**Address: Gamal Abdel Nasser st, 5th floor, public health department, Faculty of medicine, Shibin ELkom, Menoufia, Egypt**

**E.mail: zeinabkasemy@yahoo.com , zeinabkasemy@gmail.com , zeinab.kasemy@med.menofia.edu.eg**

**Funding: No fund**

**No conflict of interest**

**Contributor-ship statement:** All persons who meet authorship criteria are listed as authors, and all authors certify that they have participated sufficiently in the work to take public responsibility for the content, including participation in the concept, design, analysis, writing, or revision of the manuscript. Zeinab A. Kasemy has the role of getting the idea, performing statistical analysis, writing the methodology and results sections, final revision and publishing. Safa H. Al Kalash, family physician, has the role of writing the manuscript and revision. Wael A. Bahbah, the pediatrician, received, diagnosed and collected the data. Sally M. El Hefnawy had performed lab investigations. The entire team arranged a health education session to provide explanation about both diseases in all matters.

**Strengths:**

- The study collectively assessed the prevalence and risk factors of G6PD deficiency besides assessing the level of knowledge, attitude, and practice (KAP) regarding both of G6PD deficiency and neonatal jaundice (NNJ).
- The study clarified the extent of change towards NNJ based on previous levels published in some research articles in the same region and also drew how much G6PD deficiency despite being a serious disease; it is a poorly known one.
- A suitable sample size had been studied in a short period, which allowed us to reach large number of mothers and families.

**Limitations:**

- There was a need to carry out more investigations to the mothers like direct Coombs test.
- A posttest to assess the extent of understanding and KAP among the studied mothers was needed. But it was difficult to collect this studied number one more time. Both diseases need KAP assessment among the general population to ensure taking care of the risk factors, but we tried to help the mothers be messengers to their families specially after conducting a health education session to thank them for participation in the study.

## **Abstract:**

**Objectives:** To estimate the prevalence of Glucose-6-phosphate dehydrogenase (G6PD) deficiency among jaundiced neonates and assess the mothers' perception towards G6PD and Neonatal jaundice (NNJ).

**Background:** NNJ is a frequent complication of G6PD deficiency.

**Methods:** A cross-sectional study was carried out on 487 ethnic Egyptian neonates with indirect hyperbilirubinemia from June 2018 to July 2019. The collected data included maternal and neonatal characteristics. Laboratory investigations included serum bilirubin, reticulocyte count, ABO grouping, Rh typing, and neonatal serum G6PD. The mothers were interviewed individually using a structured, researcher administered questionnaire for assessing the perceptions of G6PD deficiency and NNJ.

**Results:** Prevalence of G6PD deficiency was 10.10%. Neonates with G6PD deficiency showed higher levels of serum bilirubin ( $P<0.001$ ). Male sex, family history of G6PD deficiency, and consanguinity worked as risk factors for G6PD deficiency (OR=4.27(95%CI: **1.66-10.99**), 9.54 (95%CI: **4.80-18.95**) and 10.219(5%CI: **5.39-19.33**) respectively). Mothers' perception towards NNJ and G6PD was low towards both diseases; with only 30% have good knowledge for NNJ and 17.10% for G6PD deficiency, positive attitude (46.8% for NNJ vs. 45.0% for G6PD deficiency) and finally good practice (29.9% for NNJ vs. 19.9% for G6PD deficiency)

**Conclusion:** G6PD deficiency seems to be an important cause of neonatal jaundice. Mothers' perception of both NNJ and G6PD deficiency was low. A mass health education program about both diseases is needed to ensure better early detection, good timing treatment and better prevention of the triggering factors to ensure better health of the children.

**Keywords:** **Awareness, G6PD deficiency, Neonatal jaundice, Perception, Knowledge Attitude Practice, Child health, Epidemiology**

## Introduction:

The term 'jaundice' is used to describe the yellow-orange discoloration of the skin and conjunctiva because of excessive bilirubin in the skin and mucous membranes. (1,2) It is not a disease, but rather a symptom or sign of a disease. (3) Jaundice (Hyperbilirubinemia) though a common benign occurrence in the 1st week of life can sometimes progress to critical levels. (4) Neonatal jaundice is a frequent complication of Glucose-6-phosphate dehydrogenase (G6PD) deficiency which is a genetic disease more often observed in males as this is X linked enzymatic deficiency but in females might present deficient activity levels which is severe enough to induce hemolysis even if they are heterozygous. (5, 6) African, Asia, Mediterranean, and Middle-Eastern descents are most commonly affected by this disorder (7, 8) Prevalence of G6PD deficiency among Egyptian neonates is (8.9%). (9) G6PD enzymatic deficiency was first reported in India, and its prevalence changes greatly from place to place. (10) The hemolysis in G6PD deficiency patients can be triggered by specific agents like specific foods, drugs, and infections rather. (6) Decreasing the incidence of severe hemolysis by avoiding the triggers and early beginning of treatment including intensive phototherapy is simple and inexpensive and can be started before symptoms appear. (8, 10, 11) Counseling should be directed to parents of deficient newborns to avoid risks of jaundice and triggering agents. (10). G6PD deficiency is commonly known in Egypt as fava bean anemia or favism (after intake of fava bean) as this enzyme deficiency increases the susceptibility of red blood cells to oxidant agents such as oxidants present in raw beans, some medications and oxidative stress caused by infections .(12) There are few studies conducted about prevalence of G6PD deficiency among Egyptian jaundiced neonates (9) and also about knowledge, attitude and practice (KAP) of NNJ or G6PD Deficiency (12,13), but updating the prevalence and measuring KAP about both of NNJ and G6PD deficiency in one study is not available. So, this study aimed to estimate the prevalence of G6PD deficiency among Egyptian jaundiced neonates and assess the mothers' perception through studying their level of KAP regarding G6PD deficiency and neonatal jaundice to allow ensuring the avoidance of triggering factors.

## Subjects & Methods:

A cross-sectional study was carried out in Egypt on 487 neonates with indirect hyperbilirubinemia from June 2018 to June 2019 at three Egyptian neonatal and pediatric

1  
2  
3 centers, medically serving its population and receiving patients from the surrounding areas. The  
4 studied neonates with their mothers visiting the involved pediatric and neonatal centers  
5 for seeking medical advice for treatment of jaundice were recruited from some Egyptian  
6 governorates mainly Menoufia governorate (the place of the study) and the surrounding  
7 near governorates. From 0-10 days of age with clinically evident jaundice, admitted term  
8 and preterm neonates were included in the study. The exclusion criteria included neonates  
9 with direct hyper-bilirubinemia >20% (Conjugated hyperbilirubinemia exists when more  
10 than 20% of the total bilirubin or more than 2 mg/dL is conjugated. If neither criterion is  
11 met, the hyperbilirubinemia is classified as unconjugated), metabolism errors, congenital  
12 anomalies and sepsis. All these exclusion criteria were set to be more focused on G6PD  
13 deficiency as a single cause for NNJ in this study. The collected data included maternal and  
14 neonatal characteristics in the form of gestational age (at admission), parity, gravidity,  
15 neonatal sex, weight, and jaundice age of onset (maternal recall). The studied neonates had  
16 been subjected prior to any treatment to laboratory investigations including serum  
17 bilirubin (total, direct, indirect), reticulocyte count, ABO grouping and Rh typing of the  
18 mother and baby, Coombs test (for baby only) and C reactive protein (as a routine and to  
19 exclude sepsis). UV-Kinetic Method using cellular enzyme determination reagents by  
20 spectrophotometry was used to measure quantitative estimation of serum G6PD by using  
21 1ml of whole blood collected in an EDTA tube. Level <4.6 u/g Hb was estimated to define  
22 G6PD deficiency (9). The studied neonates were subjected to phototherapy according to  
23 guidelines of phototherapy in hospitalized infants from  $\geq 35$  weeks of gestation (14). For  
24 assessing the perception of G6PD deficiency and neonatal jaundice, the mothers of both  
25 jaundiced (n=487) and non-current jaundiced neonates (n=3) excluded from the study due  
26 to very small number) were interviewed individually by a trained collecting data team  
27 during admission, while the neonate receiving medical examination, using a researcher  
28 administered questionnaire. We were cautious about interviewing the mothers of the  
29 current jaundiced neonates before telling them the final diagnosis to avoid taking extra-  
30 point over the mothers of non-jaundiced ones in the final analysis of the data. The  
31 questionnaire was designed by experts in pediatrics and public health specialties based on  
32 their experience in pediatrics and public involvement besides depending on published  
33 reviews of literature. A pilot study was conducted on about 30 mothers (about 6% of the  
34  
35  
36  
37  
38  
39  
40  
41  
42  
43  
44  
45  
46  
47  
48  
49  
50  
51  
52  
53  
54  
55  
56  
57  
58  
59  
60

1  
2  
3 calculated sample) to test the adequacy of the questionnaire for contents, language and  
4 time consuming and to explore the potential obstacles and difficulties that confront the  
5 execution of the work in addition to being used as a tool for training of the data collecting  
6 team (5 nurses and 3 junior staff) to avoid inter and intra-observer bias. Training was  
7 conducted with the working team for 2 days followed by testing to assess the degree of  
8 response to training and the quality of the asking and reporting. For NNJ, the questionnaire  
9 (Supplementary (Questionnaire)) included questions like mother's knowledge regarding  
10 its diagnosis, causes, complications and treatment. Regarding the attitude of mothers  
11 toward NNJ and its treatment; the questions included if the mother thinks that NNJ is a  
12 worrisome condition, etc. For practice, if she would seek medical advice. Etc. The  
13 questionnaire (Supplementary (Questionnaire)) included questions like if the mothers  
14 have ever heard about the term G6PD deficiency or the common term (fava bean anemia),  
15 in this point we continued our questions about the common term but when analyzing the  
16 data we return to the scientific term to avoid misunderstanding for the readers. The  
17 questionnaire included questions like if G6PD deficiency is a Blood disease, both parents  
18 have to be carriers for G6PD deficiency, the inheritance of G6PD deficiency related to the  
19 baby's gender, agents that can trigger an attack of G6PD deficiency like Fava beans and  
20 medications, is pallor, shortness of breath or G6PD deficiency attack is a cause of jaundice,  
21 are GIT symptoms like (nausea and vomiting) are symptoms of G6PD deficiency attack.  
22 Regarding attitude, if she sees that this is a serious problem, marriage between contagious  
23 couples is a cause, etc. Regarding practice, the questionnaire included; seeking medical  
24 advice (a general question not specifying the current condition), premarital counseling,  
25 etc., With answers scored as correct = 1 and incorrect = 0; participants with at least 60%  
26 correct answers were considered as having good knowledge. The correct answer was  
27 determined for any single or multiple right answers in order to help estimate the final  
28 score. Participants with at least 60% positive answers were considered as having a positive  
29 attitude and practice. A health education talk was given through an organized special day at  
30 a conference meeting room by the researcher to the participant mothers, with adequate  
31 clarification. The study had been approved by the local ethical committee and after  
32 explanation of the study, written consent had been received from parents and caregivers.  
33  
34  
35  
36  
37  
38  
39  
40  
41  
42  
43  
44  
45  
46  
47  
48  
49  
50  
51  
52  
53  
54  
55  
56  
57  
58  
59  
60

1  
2  
3 **Sample size calculation:** Based on past review of literature (9) who reported that prevalence of  
4 G6PD among jaundiced newborn to be 8.9% with nearly the same inclusion and exclusion  
5 criteria included in our study, sample size has been calculated using the following equation:  $n =$   
6  $(z^2 \times p \times q) / D^2$  at CI 95% and it was estimated to be 487 jaundiced neonates.  
7  
8  
9

10  
11 **Statistical analysis:** Data were analyzed by using SPSS version 22 (SPSS Inc., Chicago, IL, USA).  
12 Descriptive statistics in the form of percentage (%), mean  $\pm$ SD and range were performed. An  
13 independent t-test and ANOVA test were used for normally distributed quantitative. Chi-square ( $\chi^2$ ) was  
14 used for qualitative variables. Odds ratio (OR) was used to assess the risk of exposure. OR=1: Exposure  
15 does not affect odds of outcome, OR>1: Exposure associated with higher odds of outcome and OR<1:  
16 Exposure associated with lower odds of outcome. Pearson's correlation was used to assess direction and  
17 strength of association between variables. P-value less than 0.05 set to be statistically significant.  
18  
19  
20  
21  
22

### 23 **Patient and Public Involvement:**

24 This work aimed to study the prevalence of G6PD deficiency among Egyptian jaundiced  
25 neonates and mothers' perception regarding both diseases. To improve the relevance of research,  
26 oriented research including patient and public is vital. A paper-based survey asked some mothers  
27 seeking medical advice in the three neonatal and pediatric centers to submit their unanswered  
28 questions regarding G6PD deficiency and NNJ. The final top four research priorities in an in-  
29 person meeting were ranked. Thirty respondents submitted forty questions. The respondents  
30 were from urban and rural areas. Their ages ranged from 20-40 years. The forty questions were  
31 distilled to seventeen unique questions and from this list; the top four research questions  
32 prioritized included if these diseases are infectious ones, if they can be transferred to the next  
33 generations, if they are long-life diseases and if there is a complete cure. The respondents were  
34 subjected to questionnaires by observers to assess the degree of response and reactivity. The  
35 interviewed mothers recommended to generalize the screening over large number and to be in  
36 the most crowded districts, so we asked them to tell every pregnant woman they know to seek  
37 medical advice for free in certain neonatal centers, where we are working, if there is a doubt of  
38 having a yellow baby to encourage them participate in the study. The thirty women helped us  
39 recruit about ninety two women and the rest of the sample size was based on our advertisement  
40 plus the usual patients coming to the studied centers by their own. We organized a special day at  
41 a conference meeting room to in order to thank all participants in the first place, disseminate the  
42 results and provide an in-depth group health education session about the two diseases. Special  
43  
44  
45  
46  
47  
48  
49  
50  
51  
52  
53  
54  
55  
56  
57

1  
2  
3 focus was directed to mothers of G6PD deficient babies to avoid triggering factors and seek  
4 medical advice promptly. For other mothers, the main aim of the health education session was to  
5 correct the wrong information and to build a base for new mothers' generation who know well  
6 these diseases and be messengers to their families and surroundings.  
7  
8  
9

## 10 11 **Results:**

12  
13 The study was conducted on 478 jaundiced neonates. The mothers' age ranged from 22-39 years  
14 (31.45 ±4.77). Neonates aged (0-10 days) were distributed in 69.6% males versus 30.4%  
15 females. Their birth weight ranged from (2.30-3.50 Kg). Bilirubin levels (mg/dl) were distributed  
16 into total bilirubin (mg/dl) (15.17 ±5.14), direct bilirubin (mg/dl) (1.08 ±0.38) and indirect  
17 bilirubin (mg/dl) (13.17 ±3.74). Mean Hb (gm/dl) showed a good level of about (12.18 ±1.75)  
18 despite low and high range (9.50-14.50). The total percentage of the jaundiced neonates needed  
19 phototherapy on admission was 4.7%. G6PD deficient cases needed phototherapy on admission  
20 represented about 0.20% of the total jaundiced neonates. Family history of G6PD deficiency and  
21 consanguinity were reported among 29.6% and 21.1% respectively. ABO incompatibility and Rh  
22 incompatibility were detected in 12.9% and 9.7% respectively. **(Table 1)** Prevalence of G6PD  
23 deficiency had been reported in 10.10% (<4.6 u/g Hb distributed as 42 males (2.88 ±0.95) and 7  
24 females (4.0±0.57)). **(Fig 1)** Neonates with G6PD deficiency showed higher levels of bilirubin  
25 (total, direct and indirect) (P<0.001). In this population of jaundiced neonates, G6PD deficient  
26 neonates were more likely to be of male gender (OR=4.27, CI95%: **1.66-10.99**), to be born of  
27 consanguineous parents (OR=10.21, CI 95%: 5.39-19.33) and to be of positive family history of  
28 G6PD deficiency (OR=9.54, CI 95% 4.80-18.95). **(Table 2)** Positive correlation had been  
29 noticed between G6PD level among G6PD deficient neonates and jaundice time of onset based  
30 on maternal recall (r=0.436, P=0.002). One of the interesting findings was that total bilirubin was  
31 higher in G6PD deficient cases (23.03 ±2.94, CI: 22.18-23.87, M=23, IQR: 21.3-25) than those  
32 with RH (15.7 ±4.75, CI: 14.33-17.12, M=15, IQR: 11.6-18.2) or ABO incompatibility (11.0  
33 ±2.59, CI: 10.49-11.79, M=11, IQR: 9-13) **(Fig. 2)**. Regarding knowledge, attitude and practice  
34 (KAP) towards NNJ and G6PD deficiency, it seems that mothers showed somehow better  
35 perception towards jaundice in comparison to G6PD deficiency, but unfortunately KAP was low  
36 towards both diseases as majority of mothers (95.9%) didn't know term (G6PD deficiency) while  
37 about 24% of them heard about fava bean anemia, also 90% of them didn't know that parents  
38  
39  
40  
41  
42  
43  
44  
45  
46  
47  
48  
49  
50  
51  
52  
53  
54  
55  
56  
57



1  
2  
3 (both or just the mother) have to be carriers for G6PD deficiency to have an affected child. All  
4 mothers knew fava beans can trigger an attack of G6PD deficiency while 39.3% knew that it is  
5 triggered by drugs (**Table 3**). Almost all mothers know about neonatal jaundice, about 70% of  
6 them thought that prematurity is a cause of neonatal jaundice, 68.6% of the mothers knew that  
7 they can detect jaundice in their newborn in skin while 25% of them reported that jaundice can  
8 be defined in sclera of newborn about 95% of the mothers knew that phototherapy is method of  
9 treatment of NJJ. (**Table 4**) Good knowledge was reported in 30% for NNJ vs. 17.10% for G6PD  
10 deficiency, positive attitude was reported in 46.8% for NNJ vs. 45.0% for G6PD deficiency and  
11 finally good practice was reported in 29.9% for NNJ vs. 19.9% for G6PD deficiency (**Fig. 3**)

### 12 **Discussion:**

13  
14  
15  
16  
17  
18  
19  
20  
21 The prevalence of G6PD deficiency was reported in 10.1% of jaundiced neonates which lied  
22 within the range of the prevalence revealed in some Egyptian studies (8.9-30.2%). (9, 13) The  
23 higher prevalence of G6PD deficiency among jaundiced neonates (30.2%) in El-Menshay et al.,  
24 (13) may be due to the small sized purposive sample chosen for conducting the study. The wide  
25 range of G6PD deficiency prevalence in Egypt could be explained by Egypt's special  
26 geographical position between three continents with different ethnic groups, which is the same  
27 case on global scale where in Iraq, prevalence was 10.65% (15), in Iran, it was around 9% (16)  
28 and in South Brazil it was 7.9%. (17) Neonates with G6PD deficiency showed higher levels of  
29 bilirubin and this result goes parallel to that of Bahraini and Nigerian studies conducted by Isa et  
30 al., (18) and Badejoko et al., (19) respectively. Male sex showed to be more risky to G6PD  
31 deficiency which is similar to findings reported in Egypt by (Abo El Fotoh and Rizk (9), Abo  
32 Elella et al., (10) and El-Menshay et al.,(13)), in India by Sinha et al., (20) and in Iran by  
33 Eghbalian and Monsef (21). Family history of G6PD deficiency and consanguinity are risk  
34 factors for acquiring G6PD deficiency which coincide with an Egyptian study conducted by Abo  
35 El Fotoh and Rizk (9) and Garg and Joag (22). On the contrary, a study conducted in Japan stated  
36 that only one case of G6PD deficiency was born to non-consanguineous Japanese parents  
37 without any family history. (23) A positive correlation between G6PD deficiency and jaundice  
38 time of onset (based on maternal recall) was detected. As known, two peaks for jaundiced  
39 patients to be admitted, the first is on the 3<sup>rd</sup> day and the second is on the 7<sup>th</sup> day of life. Bimodal  
40 peaks of maximum serum bilirubin concentrations are known to happen among G6PD deficient  
41 infants and when the hemolytic episode starts early, the elevation of serum bilirubin is  
42  
43  
44  
45  
46  
47  
48  
49  
50  
51  
52  
53  
54  
55  
56  
57  
58  
59  
60

1  
2  
3 anticipated to be clear and hence a course of hyperbilirubinemia may, therefore, be predicted.  
4  
5 (24) The finding is in accordance with Abo El Fotoh and Rizk (9). But it is in disagreement with  
6  
7 Turkish study conducted by Atay et al., (25). Mean Hb (gm/dl) showed a good level of about  
8  
9 (12.18 ±1.75) despite the low and high range (9.50-14.50) and this is usual for Egyptians as the  
10  
11 prevalence of anemia among Egyptian pregnant women is about (52.5%). (26) The total  
12  
13 percentage of the jaundiced neonates needed phototherapy on admission was 4.7%. G6PD  
14  
15 deficient cases needed phototherapy on admission represented about 0.20% of the total jaundiced  
16  
17 neonates. The studied neonates were subjected to phototherapy according to guidelines of  
18  
19 phototherapy in hospitalized infants from  $\geq 35$  weeks of gestation (14). In G6PD-deficiency,  
20  
21 hyperbilirubinemia is thought to be secondary to reduced hepatic conjugation and excretion of  
22  
23 bilirubin, rather than increased bilirubin production resulting from hemolysis. (27) Total  
24  
25 bilirubin was obviously higher among G6PD deficient cases than those with RH or ABO  
26  
27 incompatibility and this finding agrees with that concluded by Das and Singh (28) in India and  
28  
29 Hussain et al., (29) in Pakistan but also in contrast to the findings obtained by Shah and Yeo (30)  
30  
31 in Singapore and Aletayeb et al. (31) in Iran. Knowledge, attitude and practice towards G6PD  
32  
33 deficiency showed that majority of mothers (95.9%) didn't know the term (G6PD deficiency)  
34  
35 which doesn't agree with Al-Joborae, (32) who found that about 91% of mothers in Iraq heard  
36  
37 about G6PD deficiency. In Egypt, the most commonly used term is "Fava bean anemia", so in  
38  
39 our study, 23% of mother heard about Fava bean anemia but 4.1% only knew the term "G6PD  
40  
41 deficiency anemia". All mothers knew that fava beans can trigger an attack of hemolysis due to  
42  
43 G6PD deficiency, hence the term came from, and this is in agreement with a study carried out in  
44  
45 Bahrain by Al Arrayed and Al Hajeri, (33). In this study, about 40% of mothers thought that  
46  
47 hemolysis can be triggered by drugs and this result is inconsistent with that obtained by  
48  
49 Almuahini et al., (34). The current study revealed that all mothers have heard about NNJ and  
50  
51 about 70% of them reported that prematurity of the infant is a cause of its occurrence and this  
52  
53 result is consistent with Magfour et al., (35) in Saudi Arabia. Jaundice can be detected in the  
54  
55 skin and sclera by 68.6% and 25% of the mothers respectively. These findings agree with that  
56  
57 achieved by Aggarwal et al., (36) in India. Despite of carrying out this study on a very selected  
58  
59 group of mothers to study the KAP but really it was of benefit as most of them were  
60  
61 experiencing a jaundiced neonate for the first time, so it seemed for us as the case of studying of  
62  
63 a group of general population, besides this group will be more able to deliver the health

1  
2  
3 education message as it is based on self-experience. Mothers showed somehow better perception  
4 towards jaundice in comparison to G6PD deficiency. This is in agreement with results reported by Boo et  
5 al., (37) in Malaysia. Our results still showed poor KAP regarding both diseases. This is in agreement  
6 with Goodman et al., (38) in Nigeria and Alfouwais et al., (39) in Saudi Arabia. In contrast to the  
7 study results, Al-Joborae, (32) in Iraq and Al Arrayed et al., (34) reported that the mothers had a  
8 fairly good level of awareness of G6PD deficiency. The study results showed some improvement  
9 in level of knowledge in comparison with Allahaony et al (40) who reported that only 18.9% of  
10 mothers had good knowledge, 48.0% had good attitude and only 25.3% had a good practice  
11 towards NNJ and that reflects the effect of health education carried out to the mothers at their  
12 study but it shows also that we are still in a bad need to more extensive and focused health  
13 education. The results showed that risk factors for hyperbilirubinemia were prematurity, ABO  
14 incompatibility, and infection, which is in agreement with (Sadat et al., (41) and Rabiyeepoor,  
15 (42) in Iran.

16  
17  
18  
19  
20  
21  
22  
23  
24  
25  
26 **Strengths:** The study collectively assessed the prevalence and risk factors of G6PD deficiency  
27 besides assessing the level of knowledge, attitude, and practice (KAP) regarding both of G6PD  
28 deficiency and neonatal jaundice (NNJ). The study clarified the extent of change towards NNJ  
29 based on previous levels published in some research articles in the same region and also drew  
30 how much G6PD deficiency despite being a serious disease; it is a poorly known one, making a  
31 special recommendation of health education sessions for every mother to be conducted in health  
32 centers from day one. A suitable sample size had been studied in a short period, which allowed  
33 us to reach large number of mothers and families.

34  
35  
36  
37  
38  
39  
40  
41 **Limitations:** There was a need to carry out more investigations to the mothers like direct  
42 Coombs test. A posttest to assess the extent of understanding and KAP among the studied  
43 mothers was needed. But it was difficult to collect this studied number one more time. We  
44 reached only the mothers who sought medical advice for their neonates. Both diseases need KAP  
45 assessment among the general population to ensure taking care of the risk factors, but we tried to  
46 help the mothers be messengers to their families specially after conducting a health education  
47 session to thank them for participation in the study.

48  
49  
50  
51  
52  
53 **Conclusion:** G6PD deficiency seems to be an important cause of neonatal jaundice. Cord blood  
54 for complete blood count, direct Coombs' test, blood grouping, bilirubin and G6PD screening is  
55

1  
2  
3 better to be performed in high-risk populations, to early consider a prolonged hospital stay.  
4 G6PD deficiency and NNJ are serious conditions so by studying KAP of mothers, the study  
5 revealed that mothers' KAP about NNJ despite being still low but it shows promising  
6 improvement while KAP about G6PD deficiency is so poor. So it so evitable to apply a mass  
7 health education program about both of G6PD deficiency and NNJ to ensure better early  
8 detection, good timing treatment and better prevention of the triggering factors to ensure better  
9 health of the children.  
10  
11  
12  
13  
14  
15

16 **Acknowledgement:** Thanks for participants and the team who helped in data collection  
17

18 **Ethical Approval:** Institutional Review Boards (IRB) of the Menoufia faculty of medicine had  
19 approved the study. Research work had been performed in accordance with the Declaration of  
20 Helsinki. A written patient's Consent was taken after explanation of all aspects of the study and  
21 gave them the right to withdraw at any time.  
22  
23  
24  
25

26 **Data sharing statement:** Data are available to be shared on request by e. mailing  
27

28 [zeinabkasemy@yahoo.com](mailto:zeinabkasemy@yahoo.com)  
29

30 **Funding Disclosures:** All authors certify that no funding has been received for the conduct of  
31 this study and/or preparation of this manuscript.  
32  
33

### 34 **References**

- 35 1. Khan R, Houlihan D. Newsome PN. Investigating jaundice. *Medicine*. 2015;  
36 43(10):573–576.
- 37 2. Azzuqa A., Watchko J. F., “Bilirubin Concentrations in Jaundiced Neonates with  
38 Conjunctival Icterus,” *J. Pediatr*. 167(4), 840–844 (2015).10.1016/j.jpeds.2015.06.065
- 39 3. Brits H, Adendorff J, Huisamen D, Beukes D, Botha K Herbst H, Joubert G: The  
40 prevalence of neonatal jaundice and risk factors in healthy term neonates at National  
41 District Hospital in Bloemfontein. *Afr J Prim Health Care Fam Med*. 2018; 10(1):  
42 1582.  
43
- 44 4. Watson RL. Hyperbilirubinemia. *Crit Care Nurs Clin North Am* 2009; 21:97-120.
- 45 5. Beutler E. Glucose-6-phosphate dehydrogenase deficiency: a historical  
46 perspective. *Blood*. 2008; 111(1):16-24.
- 47 6. Kaplan M, Hammerman C. Neonatal screening for glucose-6-phosphate dehydrogenase  
48 deficiency: biochemical versus genetic technologies. *Semin Perinatol*. 2011; 35(3):155-  
49 61.  
50
- 51 7. Frank JE. Diagnosis and management of G6PD deficiency *Am Fam Physician*. 2005  
52 Oct 1;72(7):1277-82.  
53  
54  
55  
56  
57  
58  
59  
60

8. Abo El Fotoh M, Rizk M: Prevalence of glucose-6-phosphate dehydrogenase deficiency in jaundiced Egyptian neonates. *J Matern Fetal Neonatal Med.* 2016 Dec;29(23):3834-7.
9. Abo Elella S, Tawfik M, Barseem N, and Moustafa W: Prevalence of glucose-6-phosphate dehydrogenase deficiency in neonates in Egypt. *Ann Saudi Med.* 2017; 37(5): 362–365.
10. La Rue N, Kahn M, Murray M, Leader BT, Bansil P, McGray S, Kalnoky M, Zhang H, Abo Elella S, Tawfik M, Barseem N, and Moustafa W: Prevalence of glucose-6-phosphate dehydrogenase deficiency in neonates in Egypt. *Ann Saudi Med.* 2017; 37(5): 362–365.
11. Glader B. Hereditary hemolytic anemias due to red blood cell enzyme disorders. In: Greer JP, Foerster J, Rodgers GM, et al., editors. *Wintrobe's Clinical Hematology.* 12th ed. Lippincott, Williams & Wilkins; Philadelphia: 2009; 933.
12. El-Sayed L, Tantawi H, Adly A & Farouk M: Prevention of Hemolytic Crisis among G6PD Children: Effect of Educational Program Intervention. *Journal of American Science* 2012;8(12)
13. El-Menshay A, Khalifa N, Awad S, Fathy M and Amer A. Prevalence of Glucose-6-phosphate Dehydrogenase Deficiency in Jaundiced Neonates in Egypt. *Australian Journal of Basic and Applied Sciences*, 2009; 3(3): 2016-2023.
14. American Academy of Pediatrics Subcommittee on Hyperbilirubinemia. *Pediatrics.* 2004 Jul; 114(1):297-316.
15. Frankool WM, Al-Tu'ma FJ. Molecular basis of G6PD deficiency in hyperbilirubinemic neonates in Middle Euphrates Province: Iraq. *Karbala J Med* 2010;3:98–102.
16. Karimi M, Martinez di Montemuros F, Danielli MG, et al. Molecular characterization of glucose-6-phosphate dehydrogenase deficiency in the Fars province of Iran. *Haematologica* 2003;88: 346–7.
17. Castro S, Weber R, Dadalt V, et al. Prevalence of G6PD deficiency in newborns in the south of Brazil. *J Med Screen* 2006;13:85–6.
18. Isa H, Mohamed M, Mohamed A, Abdulla A, Abdulla F: Neonatal indirect hyperbilirubinemia and glucose-6-phosphate dehydrogenase deficiency, *Korean J Pediatr.* 2017; 60(4): 106–111.
19. Badejoko BO, Owa JA, Oseni SBA, Badejoko O, Fatusi AO, Adejuyigbe EA. Early Neonatal Bilirubin, Hematocrit, and Glucose-6-Phosphate Dehydrogenase Status, *Pediatrics* 2014;134(4) e1082-1088
20. Sinha R, Sachendra B, Syed S, Nair L, John B. To study the prevalence of glucose 6 phosphate dehydrogenase(G6PD) deficiency in neonates with neonatal hyperbilirubinemia and to compare the course of the neonatal jaundice in deficient versus non deficient neonates.2017; 6(2) 71-74
21. Eghbalian E, Monsef A, Evaluation of Glucose-6-Phosphate Dehydrogenase Deficiency without Hemolysis in Icteric Newborns. *Iran J Pediatr.* 2007; 17( 1) Das M, Singh A. A comparative study of peak total serum bilirubin level in neonates with ABO incompatibility, Rh incompatibility and G6PD deficiency. *IOSR Journal of Dental and Medical Sciences (IOSR-JDMS).* 2018; 17 (10):21-23.
22. Garg s, Joag G. Assessment of the prevalence of G6PD deficiency in RBCs of live newborns born at tertiary care hospital. *International Journal of Contemporary Pediatrics* Garg S et al. *Int J Contemp Pediatr.* 2019; 6 (2):676-682.

23. Tsuzuki,S , Akahira-Azuma M, Kaneshige M, Shoya K , Hosokawa Sh, Kanno H, Matsushita T. A Japanese neonatal case of glucose-6-phosphate dehydrogenase deficiency presenting as severe jaundice and hemolytic anemia without apparent trigger, Springerplus. 2013; 2: 434
24. Valaes T. Severe neonatal jaundice associated with glucose-6- phosphate dehydrogenase deficiency: pathogenesis and globalepidemiology. Acta Paediatr Suppl 1994; 394:58–76.
25. Atay E, Bozaykut A, Ipek I: Glucose-6-phosphate Dehydrogenase Deficiency in Neonatal Indirect Hyperbilirubinemia. Journal of Tropical Pediatrics. 2006; 52, (1):56-58
26. Abu Salem M, O Mahrous O, El Shazly H, Ibrahim R, Al-oshari S Epidemiology of iron-deficiency anemia among pregnant women in menoufia governorate, Egypt and Taiz Governorate, Yemen: A comparative study). MMJ. 2016; 29 (4) 1005-1011. DOI: 10.4103/1110-2098.202491.
27. Sinha R, Sachendra B, Sabid Syed V, Nair L, John BM. To study the prevalence of glucose 6 phosphate dehydrogenase (G6PD) deficiency in neonates with neonatal hyperbilirubinemia and to compare the course of the neonatal jaundice in deficient versus non deficient neonates. Journal of Clinical Neonatology. 2017; 6 (2) 71-74. DOI: 10.4103/jcn.JCN\_59\_16
28. Das M, Singh A. A comparative study of peak total serum bilirubin level in neonates with ABO incompatibility, Rh incompatibility and G6PD deficiency. IOSR Journal of Dental and Medical Sciences (IOSR-JDMS) :2018 ; 17, 10 ( 2 ) , 21-23.
29. Hussain M, Irshad M, Kalim M, Ali L. Glucose-6-Phosphate Dehydrogenase Deficiency In Jaundiced Neonates .JMPI. 2010; 94(2): 122-196.
30. Shah V, Yeo C. Identifying Risk of Neonatal Hyperbilirubinaemia and Early Discharge for Glucose-6-Phosphate Dehydrogenase Deficient Newborns in Singapore. Ann Acad Med Singapore 2007; 36: 1003-1009
31. Aletayeb S, Dehdashtian M , Aramesh M, Arash M, Hedayati Z and Taher M.Outcome of Jaundice in neonates with ABO and Rh blood incompatibility and glucose-6-phosphate dehydrogenase deficiency: Biomedical Research 2017; 28 (8): 3440-3444
32. Al-Joborae S. Extent of Knowledge of Mothers of Neonates with G6PD Deficiency in Hilla City. Journal of Babylon University/ Pure and Applied Sciences. 2015;23(4): 1542-1550
33. Al Arrayed S, Al Hajeri A. Public Awareness of Glucose-6-Phosphate Dehydrogenase (G6PD) Deficiency. Bahrain Medical Bulletin, 2011;33: (3), available at: [https://www.researchgate.net/publication/301640243\\_Public\\_Awareness\\_of\\_Glucose\\_-6-\\_Phosphate\\_Dehydrogenase\\_Deficiency\\_in\\_Sokoto](https://www.researchgate.net/publication/301640243_Public_Awareness_of_Glucose_-6-_Phosphate_Dehydrogenase_Deficiency_in_Sokoto)
34. Almuahini MS, Alruzayhi MK, Alwassel AI, Alateeq OM: Public Awareness of Glucose-6-Phosphate Dehydrogenase (G6PD) Deficiency Causes and Prevalence Factors: The Journal of Middle East and North Africa Sciences 2018; 4(2) available at:<http://oaji.net/pdf.html?n=2017/2705-1517398879.pdf>
35. Magfour H, Aqeel A, Maashi A, Maghfuri N, Jarad R, Kathiah AA, Abdu DA, Almudeer A. Mothers' perception of neonatal jaundice in Jazan Region, KSA. J Clin Neonatol 2019; 8:116-9

- 1  
2  
3  
4  
5  
6  
7  
8  
9  
10  
11  
12  
13  
14  
15  
16  
17  
18  
19  
20  
21  
22  
23  
24  
25  
26  
27  
28  
29  
30  
31  
32  
33  
34  
35  
36  
37  
38  
39  
40  
41  
42  
43  
44  
45  
46  
47  
48  
49  
50  
51  
52  
53  
54  
55  
56  
57  
58  
59  
60
36. Aggarwal B, Agrawal A, Chaudhary P, Gupta G, Rana S, Gupta S. Neonatal Jaundice: Knowledge, attitude beliefs, and practices of postnatal mothers in a tertiary care hospital in Uttarakhand, India. *Indian J Child Health*.2017; 4(4):603-608.
  37. Boo N, Gan C, Gian Y, Lim K, Lim M, Krishna-Kumar H. Malaysian Mothers' Knowledge & Practices on Care of Neonatal Jaundice. *Med J Malaysia*. 2011; 66(3):239-43.
  38. Goodman O, Kehinde O, Odugbemi B, Femi-Adebayo T, Odusanya O. Neonatal Jaundice: Knowledge, Attitude and practices of mothers in Mosan-Okunola community, Lagos, Nigeria.2015;22(3): 158-163.
  39. Alfouwais N, Seada L, Alahmadi R, Alassiri A. Assessment of Knowledge, Attitude and Practice of Saudi Parents towards Neonatal Jaundice (NNJ): The Egyptian Journal of Hospital Medicine. 2018; 70 (9):1686-1694
  40. Allahony DM, Hegazy NN, Kasemy ZA, Bahgat EM. Mothers' perception toward neonatal jaundice in Kafr El-batanoon village, Menoufia, Egypt. *Menoufia Medical Journal* 2016; 29:743–748
  41. Saadat SH, Naderi S, Zare S, Khalili S, Darban B, Goodarzi R. Epidemiologic Study of Jaundice in Newborns with Jaundice in the First 24 hours of Birth in Children's Hospital and Shariati Hospital of Bandar Abbas in 2010-2014. *Journal of Research in Medical and Dental Science* 2018; 6( 1): 113-117
  42. Rabiyeepoor S, Gheibi Sh, Jafari S. To Study the Knowledge and Attitude of Postnatal Mothers on Neonatal Jaundice in Motahari Hospital, Iran. *Clinical Medicine Research* 2014; 3(1): 1-5

1  
2  
3 **Legend of figure:**  
4

5 Fig 1: Prevalence of G6PD deficiency among the studied jaundiced neonate group  
6

7 Fig 2: Total bilirubin distribution among patients with G6PD deficiency, RH incompatibility and  
8 ABO incompatibility  
9

10 Fig 3: Perception of G6PD deficiency and neonatal jaundice among the studied mothers  
11  
12  
13  
14  
15  
16  
17  
18  
19  
20  
21  
22  
23  
24  
25  
26  
27  
28  
29  
30  
31  
32  
33  
34  
35  
36  
37  
38  
39  
40  
41  
42  
43  
44  
45  
46  
47  
48  
49  
50  
51  
52  
53  
54  
55  
56  
57  
58  
59  
60

For peer review only



Table 1: General characteristics of the studied mothers and jaundiced neonates:

| General characteristics                                                  | Study group<br>(n=487) |             |
|--------------------------------------------------------------------------|------------------------|-------------|
| <b>Mothers' characteristics</b>                                          |                        |             |
| <b>Age (Y)</b> (Mean $\pm$ SD, range)                                    | 31.45 $\pm$ 4.77       | 39-22       |
| <b>Gestational age(week)</b>                                             |                        |             |
| Mean $\pm$ SD, range)                                                    | 37.71 $\pm$ 1.05       | 41-37       |
| Median, IQR                                                              | 37                     | 37-38       |
| <b>BMI(kg/m<sup>2</sup>)</b> (Mean $\pm$ SD, range)                      | 22.02 $\pm$ 2.37       | 27.10-18.30 |
| <b>Gravidity no,%</b>                                                    |                        |             |
| $\leq 3$                                                                 | 292                    | 60.0        |
| $> 3$                                                                    | 195                    | 40.0        |
| <b>Parity no,%</b>                                                       |                        |             |
| $\leq 2$                                                                 | 252                    | 51.7        |
| $> 2$                                                                    | 235                    | 48.3        |
| <b>Neonatal characteristics</b>                                          |                        |             |
| <b>Sex: no,%</b>                                                         |                        |             |
| Male                                                                     | 339                    | 69.6        |
| Female                                                                   | 148                    | 30.4        |
| <b>Birth weight (kg)</b> (Mean $\pm$ SD, range)                          | 2.60 $\pm$ 0.29        | 3.50-2.30   |
| <b>Age of neonate(days)</b> (Mean $\pm$ SD, range)                       | 4.45 $\pm$ 0.86        | 8-3         |
| <b>Bilirubin(mg/dl)</b> (Mean $\pm$ SD, range)                           |                        |             |
| • Total                                                                  | 15.17 $\pm$ 5.14       | 25.50-7.30  |
| • Direct                                                                 | 1.08 $\pm$ 0.38        | 1.50-0.50   |
| • Indirect                                                               | 13.17 $\pm$ 3.74       | 23.15-6.40  |
| <b>Hb (gm/dl)</b> (Mean $\pm$ SD, range)                                 | 12.18 $\pm$ 1.75       | 14.50-9.50  |
| <b>Reticulocyte count (%)</b> (Mean $\pm$ SD, range)                     | 3.38 $\pm$ 1.30        | 6.0-1.40    |
| <b>Age of onset of jaundice (Maternal recall)</b> (Mean $\pm$ SD, range) | 3.45 $\pm$ 0.85        | 7-2         |
| <b>Need for Phototherapy on admission (no, %)</b>                        |                        |             |
| G6PD deficiency                                                          | 5                      | 0.20        |
| All causes                                                               | 23                     | 4.7         |
| <b>Family history of G6PD deficiency (no, %)</b>                         | 144                    | 29.6        |
| <b>Consanguinity (no, %)</b>                                             | 103                    | 21.1        |
| <b>ABO incompatibility (no, %)</b>                                       | 63                     | 12.9        |
| <b>Rh incompatibility (no, %)</b>                                        | 47                     | 9.7         |

**Table 2: Distribution of the studied G6PD groups regarding bilirubin, neonate sex, family history and consanguinity:**

|                                          | G6PD                           |            |                               |            | Test sig                         | of P value        | OR CI 95%                |
|------------------------------------------|--------------------------------|------------|-------------------------------|------------|----------------------------------|-------------------|--------------------------|
|                                          | Deficient No.=49 Mean $\pm$ SD |            | Normal No. =438 Mean $\pm$ SD |            |                                  |                   |                          |
| <b>Bilirubin(mg/dl)</b>                  |                                |            |                               |            |                                  |                   |                          |
| • Total                                  | 23.03                          | $\pm$ 2.94 | 14.30                         | $\pm$ 4.55 | <b>t=18.40</b>                   | <b>&lt;0.001*</b> | -                        |
| • Direct                                 | 1.38                           | $\pm$ 0.14 | 1.02                          | $\pm$ 0.41 | <b>t=12.47</b>                   | <b>&lt;0.001*</b> |                          |
| • Indirect                               | 17.02                          | $\pm$ 3.45 | 12.74                         | $\pm$ 3.52 | <b>t=8.21</b>                    | <b>&lt;0.001</b>  |                          |
| <b>Neonate Sex</b>                       | no                             | %          | no                            | %          |                                  |                   |                          |
| Male                                     | 42                             | 85.7       | 297                           | 45.0       | <b><math>\chi^2=10.49</math></b> | <b>0.001*</b>     | <b>4.27(1.66-10.99)</b>  |
| Female                                   | 7                              | 14.3       | 141                           | 55.0       |                                  |                   | <b>1.0</b>               |
| <b>Family history of G6PD deficiency</b> |                                |            |                               |            |                                  |                   |                          |
| +ve                                      | 37                             | 75.5       | 107                           | 24.4       | <b><math>\chi^2=55.21</math></b> | <b>&lt;0.001*</b> | <b>9.54(4.80-18.95)</b>  |
| -ve                                      | 12                             | 24.5       | 331                           | 75.6       |                                  |                   | <b>1.0</b>               |
| <b>Consanguinity</b>                     |                                |            |                               |            |                                  |                   |                          |
| +ve                                      | 33                             | 67.3       | 70                            | 16.0       | <b><math>\chi^2=69.72</math></b> | <b>&lt;0.001*</b> | <b>10.21(5.39-19.33)</b> |
| -ve                                      | 16                             | 32.7       | 368                           | 84.0       |                                  |                   | <b>1.0</b>               |

**\*Significant, family history: not in the current family but in their relatives**



**Table 4: Knowledge, attitude and practice of the studied mothers regarding NNJ:**

| <b>No.=487</b>                             |           |          |                                                               |           |          |
|--------------------------------------------|-----------|----------|---------------------------------------------------------------|-----------|----------|
| <b>Knowledge</b>                           | <b>no</b> | <b>%</b> | <b>Attitude</b>                                               | <b>no</b> | <b>%</b> |
| <b>Hearing about NNJ</b>                   |           |          | NNJ is a worrisome condition?                                 |           |          |
| Yes                                        | 487       | 100.0    | - Yes                                                         | 248       | 50.9     |
| No                                         | 0         | 0.0      | - No                                                          | 200       | 41.1     |
| <b>Site to detect NNJ</b>                  |           |          | - I don't know                                                | 39        | 8.0      |
| Skin                                       | 334       | 68.6     | Phototherapy is the best way in treatment                     |           |          |
| Eye                                        | 123       | 25.2     | - Yes                                                         | 409       | 84       |
| Tongue                                     | 30        | 6.2      | - No                                                          | 8         | 1.6      |
| <b>Causes</b>                              |           |          | - I don't know                                                | 70        | 14.4     |
| Prematurity                                | 341       | 70.0     | Blood exchange transfusion is the best way of management      | 107       | 22       |
| ABO disparity between mother and baby      | 73        | 15.0     | - Yes                                                         | 50        | 10.3     |
| Breastfeeding                              | 146       | 30.0     | - No                                                          | 330       | 67.7     |
| Infection                                  | 139       | 33.0     | - I don't know                                                |           |          |
| Hemolysis                                  | 194       | 39.8     | Is it important seeking medical advice                        |           |          |
| Dehydration                                | 170       | 34.9     | - Yes                                                         | 450       | 92.4     |
| Increased U/S examination during pregnancy | 292       | 60.0     | - No                                                          | 20        | 4.1      |
| Diabetic mothers                           | 73        | 15.0     | - I don't know                                                | 18        | 13.5     |
| Others                                     | 141       | 28.9     |                                                               |           |          |
| <b>Complications</b>                       |           |          |                                                               |           |          |
| Death                                      | 146       | 30.0     | <b>Practice</b>                                               | <b>no</b> | <b>%</b> |
| Cerebral palsy                             | 112       | 23.0     | <b>Seeking quickly medical advice if having baby with NNJ</b> |           |          |
| Mental retardation                         | 170       | 34.9     | - Yes                                                         | 477       | 95.9     |
| Handicapping                               | 112       | 23.0     | - No                                                          | 10        | 4.1      |
| Hearing loss                               | 30        | 6.2      | - I don't know                                                | 0         | 0.0      |
| <b>Methods of treatment</b>                |           |          | <b>Causes of denial of medical care :</b>                     |           |          |
| Phototherapy                               | 461       | 94.7     | - Afraid of hospitalization.                                  | 6         | 60.0     |
| Blood exchange transfusion                 | 146       | 30.0     | - Admission/ investigation not required.                      | 1         | 10.0     |
| Drugs                                      | 399       | 82.0     | - High cost of medical care.                                  | 2         | 20.0     |
| Neon lamp                                  | 364       | 74.7     | - Lack of transportation.                                     | 0         | 0.0      |
| Increase breastfeeding                     | 238       | 48.9     | - Long hours to reach hospital.                               | 0         | 0.0      |
|                                            |           |          | <b>Time of seeking medical advice</b>                         |           |          |
|                                            |           |          | - Within 24-48 h                                              | 136       | 28.5     |
|                                            |           |          | - >48 h                                                       | 341       | 71.5     |
|                                            |           |          | <b>Continuation of breastfeeding</b>                          |           |          |
|                                            |           |          | - Yes                                                         | 448       | 92.0     |
|                                            |           |          | - No                                                          | 39        | 8.0      |

1  
2  
3  
4  
5  
6  
7  
8  
9  
10  
11  
12  
13  
14  
15  
16  
17  
18  
19  
20  
21  
22  
23  
24  
25  
26  
27  
28  
29  
30  
31  
32  
33  
34  
35  
36  
37  
38  
39  
40  
41  
42  
43  
44  
45  
46  
47  
48  
49  
50  
51  
52  
53  
54  
55  
56  
57  
58  
59  
60

~~Copyright 2019, BMJ Group, All rights reserved. No reuse allowed without permission. See: <http://www.bmj.com/permissions>. For information on reprints, contact [reprints@bmj.com](mailto:reprints@bmj.com). For more information on the BMJ group, see <http://www.bmj.com/about>.~~

For peer review only

1  
2  
3  
4  
5  
6  
7  
8  
9  
10  
11  
12  
13  
14  
15  
16  
17  
18  
19  
20  
21  
22  
23  
24  
25  
26  
27  
28  
29  
30  
31  
32  
33  
34  
35  
36  
37  
38  
39  
40  
41  
42  
43  
44  
45  
46  
47  
48  
49  
50  
51  
52  
53  
54  
55  
56  
57  
58  
59  
60



Fig 1: Prevalence of G6PD deficiency among the studied jaundiced neonate group  
63x38mm (300 x 300 DPI)

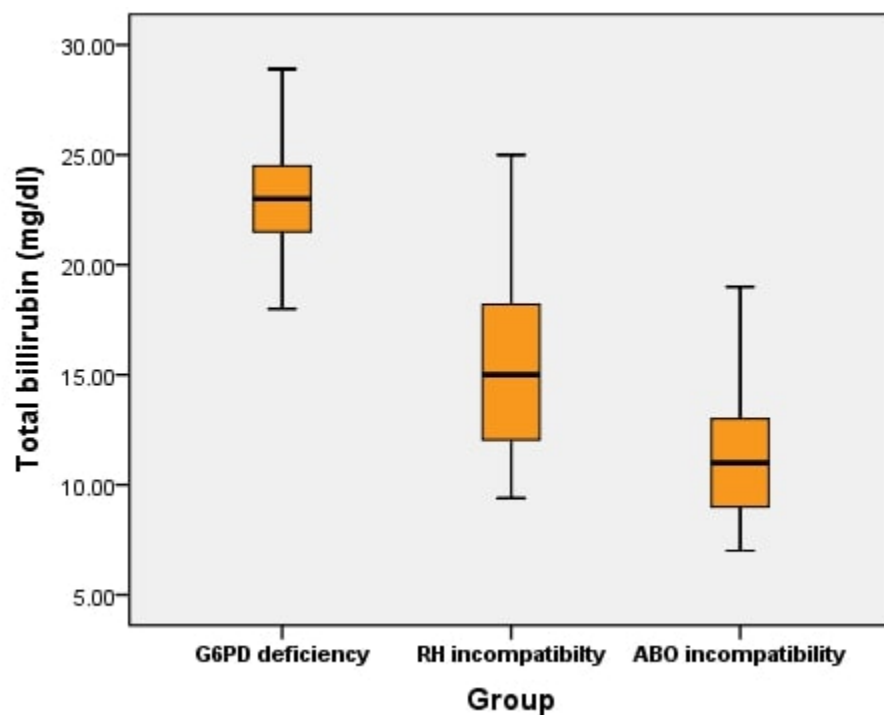

Fig 2: Total bilirubin distribution among patients with G6PD deficiency, RH incompatibility and ABO incompatibility

38x31mm (300 x 300 DPI)

1  
2  
3  
4  
5  
6  
7  
8  
9  
10  
11  
12  
13  
14  
15  
16  
17  
18  
19  
20  
21  
22  
23  
24  
25  
26  
27  
28  
29  
30  
31  
32  
33  
34  
35  
36  
37  
38  
39  
40  
41  
42  
43  
44  
45  
46  
47  
48  
49  
50  
51  
52  
53  
54  
55  
56  
57  
58  
59  
60

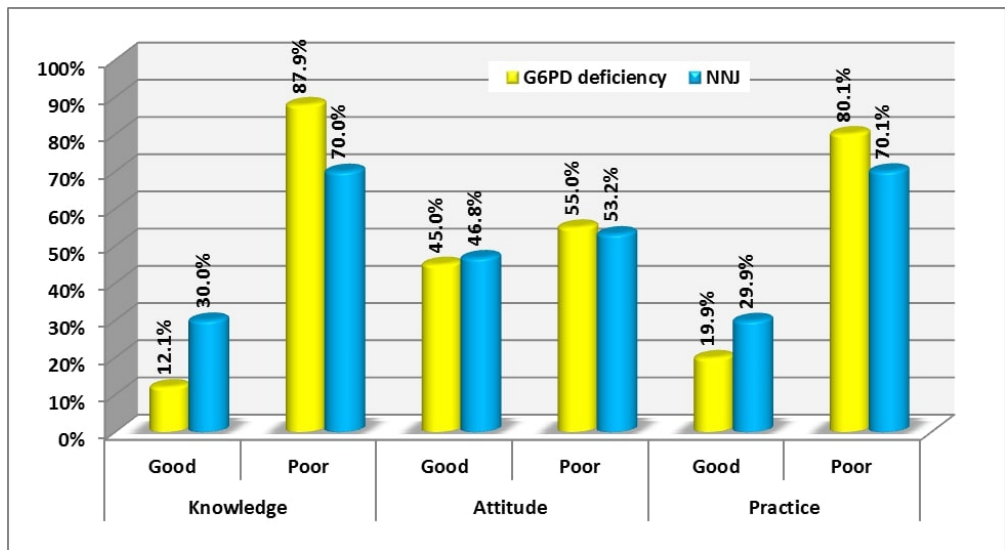

Fig 3: Knowledge, attitude and practice of G6PD deficiency and neonatal jaundice among the studied mothers

82x45mm (300 x 300 DPI)



## Questionnaire for assessing Prevalence and Mothers' perception of G6PD Deficiency among Jaundiced Neonates

| Mothers' characteristics           |                        |                           |                                                                                                                                                   |
|------------------------------------|------------------------|---------------------------|---------------------------------------------------------------------------------------------------------------------------------------------------|
| Age (Y):                           | Gestational age(week): | Wight (Kg):               | Height (cm):                                                                                                                                      |
| Gravidity:                         | Parity:                |                           |                                                                                                                                                   |
| Neonatal characteristics           |                        |                           |                                                                                                                                                   |
| Sex:                               | Male                   | Female                    |                                                                                                                                                   |
| Birth weight (kg):                 | Age of neonate(days):  | Age of onset of jaundice: |                                                                                                                                                   |
| Need for Phototherapy on admission | +ve                    | -ve                       |                                                                                                                                                   |
| For G6PD deficient cases           | +ve                    | -ve                       |                                                                                                                                                   |
| All patients                       | +ve                    | -ve                       |                                                                                                                                                   |
| Family history of G6PD deficiency  | +ve                    | -ve                       |                                                                                                                                                   |
| Consanguinity                      | +ve                    | -ve                       |                                                                                                                                                   |
| Lab investigation:                 |                        |                           |                                                                                                                                                   |
| Bilirubin(mg/dl)                   |                        |                           | <ul style="list-style-type: none"> <li>Hb (gm/dl)</li> <li>Reticulocyte count</li> <li>ABO incompatibility</li> <li>Rh incompatibility</li> </ul> |
| • Total                            |                        |                           |                                                                                                                                                   |
| • Direct                           |                        |                           |                                                                                                                                                   |
| • Indirect                         |                        |                           |                                                                                                                                                   |

G6PD(u/g Hb):

**Knowledge, attitude and practice of the studied mothers regarding G6PD deficiency:**

- **Have you heard about G6PD deficiency (Per say)?**
  - Yes
  - No
- **Have you heard about fava bean anemia (G6PD deficiency)?**
  - Yes
  - No
- **Is fava bean anemia (G6PD deficiency) a blood disease?**
  - Yes (T)
  - No
  - I don't know
- **Is fava bean anemia (G6PD deficiency) a hereditary disease:**
  - Yes (T)
  - No
  - I don't know
- **Do parents (both or just the mother) have to be carriers for fava bean anemia (G6PD deficiency) to get an affected child?**
  - Yes (T)
  - No
  - I don't know
- **Is the inheritance of G6PD deficiency related to the baby's gender?**
  - Yes (T)
  - No
  - I don't know
- **Do you know whether personally you may have a fava bean anemia (G6PD deficiency) child if you have risk factors?**
  - Yes (T)
  - No
  - I don't know
- **Is the family history of fava bean anemia (G6PD deficiency) a condition for occurrence of G6PD deficiency?**
  - Yes (T)
  - No
  - I don't know
- **Can some medications trigger an attack of fava bean anemia (G6PD deficiency)?**

- Yes (T)
- No
- I don't know
- **Is pallor a symptom of fava bean anemia (G6PD deficiency) attack?**
- Yes (T)
- No
- I don't know
- **May nausea, vomiting, anorexia and diarrhea be symptoms of fava bean anemia (G6PD deficiency) attack?**
- Yes
- No (T)
- I don't know
- **May dizziness be a symptom of fava bean anemia (G6PD deficiency) attack?**
- Yes (T)
- No
- I don't know
- **May shortness of breath be a symptom of fava bean anemia (G6PD deficiency) attack?**
- Yes (T)
- No
- I don't know
- **Is fava bean anemia (G6PD deficiency) a cause of Jaundice?**
- Yes (T)
- No
- I don't know

#### Attitude

- **Is fava bean anemia (G6PD deficiency) a serious problem?**
- Yes (T)
- No
- I don't know
- **Is consanguinity a cause of the disease?**
- Yes (T)
- No
- I don't know
- **Should next pregnancy be prevented if there is one child has the disease within the family?**
- Yes
- No (T)
- I don't know
- **Should follow-up of the diseased child continue for life?**
- Yes (T)
- No
- I don't know

#### Practice

- **Have you been subjected to premarital counseling?** - Yes -No
- **Have you been subjected to genetic screening?**
- Yes
- No
- I don't know
- **Do you seek medical advice after delivery to be assured?**
- Yes
- No

#### Knowledge, attitude and practice of the studied mothers regarding NNJ:

- **Have you heard about neonatal jaundice?** - Yes -No
- **What are sites to detect neonatal jaundice?**
- Skin (T)
- Eye (T)
- Tongue (F)

- **What are causes of neonatal jaundice?**
  - Prematurity (T)
  - ABO disparity between mother and baby (T)
  - Lack of breastfeeding (T)
  - Infection (T)
  - Hemolysis (T)
  - Dehydration (F)
  - Increased U/S examination during pregnancy (F)
  - Diabetic mothers (F)
- **What are complications of neonatal jaundice?**
  - Death (T)
  - Cerebral palsy (F)
  - Mental retardation (F)
  - Handicapping (F)
  - Hearing loss (F)
- **What are methods of treatment of neonatal jaundice?**
  - Phototherapy (T)
  - Blood exchange transfusion (T)
  - Drugs (F)
  - Neon lamp(T)
  - Increase breastfeeding(T)

### Attitude

- **Is neonatal jaundice a worrisome condition?**
  - Yes (T)
  - No
  - I don't know
- **Is phototherapy the best way in treatment?**
  - Yes
  - No (T)
  - I don't know
- **Is blood exchange transfusion the best way of management?**
  - Yes
  - No (T)
  - I don't know
- **Is it important seeking medical advice?**
  - Yes (T)
  - No
  - I don't know

### Practice

- **Do you seek medical advice if having baby with NNJ**
  - Yes
  - No
  - I don't know
- **If no why?**
  - Afraid of hospitalization.
  - Admission/ investigation not required.
  - High cost of medical care.
  - Lack of transportation.
  - Long hours to reach hospital.
- **When do you seek a medical advice?**
  - Within 24-48 h (T)
  - >48h
- **Will you continue breastfeeding?**
  - Yes (T)
  - No

**STROBE 2007 (v4) checklist of items to be included in reports of observational studies in epidemiology\***  
**Checklist for cohort, case-control, and cross-sectional studies (combined)**

| Section/Topic             | Item # | Recommendation                                                                                                                                                                                                                                                                                                                                                                                                                                                         | Reported on page # |
|---------------------------|--------|------------------------------------------------------------------------------------------------------------------------------------------------------------------------------------------------------------------------------------------------------------------------------------------------------------------------------------------------------------------------------------------------------------------------------------------------------------------------|--------------------|
| Title and abstract        | 1      | (a) Indicate the study's design with a commonly used term in the title or the abstract                                                                                                                                                                                                                                                                                                                                                                                 | 1                  |
|                           |        | (b) Provide in the abstract an informative and balanced summary of what was done and what was found                                                                                                                                                                                                                                                                                                                                                                    | 2                  |
| <b>Introduction</b>       |        |                                                                                                                                                                                                                                                                                                                                                                                                                                                                        |                    |
| Background/rationale      | 2      | Explain the scientific background and rationale for the investigation being reported                                                                                                                                                                                                                                                                                                                                                                                   | 3                  |
| Objectives                | 3      | State specific objectives, including any pre-specified hypotheses                                                                                                                                                                                                                                                                                                                                                                                                      | 3                  |
| <b>Methods</b>            |        |                                                                                                                                                                                                                                                                                                                                                                                                                                                                        |                    |
| Study design              | 4      | Present key elements of study design early in the paper                                                                                                                                                                                                                                                                                                                                                                                                                | 3                  |
| Setting                   | 5      | Describe the setting, locations, and relevant dates, including periods of recruitment, exposure, follow-up, and data collection                                                                                                                                                                                                                                                                                                                                        | 4                  |
| Participants              | 6      | (a) <i>Cohort study</i> —Give the eligibility criteria, and the sources and methods of selection of participants. Describe methods of follow-up<br><i>Case-control study</i> —Give the eligibility criteria, and the sources and methods of case ascertainment and control selection. Give the rationale for the choice of cases and controls<br><i>Cross-sectional study</i> —Give the eligibility criteria, and the sources and methods of selection of participants | 4                  |
|                           |        | (b) <i>Cohort study</i> —For matched studies, give matching criteria and number of exposed and unexposed<br><i>Case-control study</i> —For matched studies, give matching criteria and the number of controls per case                                                                                                                                                                                                                                                 |                    |
| Variables                 | 7      | Clearly define all outcomes, exposures, predictors, potential confounders, and effect modifiers. Give diagnostic criteria, if applicable                                                                                                                                                                                                                                                                                                                               | 4-5                |
| Data sources/ measurement | 8*     | For each variable of interest, give sources of data and details of methods of assessment (measurement). Describe comparability of assessment methods if there is more than one group                                                                                                                                                                                                                                                                                   | 4-5                |
| Bias                      | 9      | Describe any efforts to address potential sources of bias                                                                                                                                                                                                                                                                                                                                                                                                              | 10                 |
| Study size                | 10     | Explain how the study size was arrived at                                                                                                                                                                                                                                                                                                                                                                                                                              | 5                  |
| Quantitative variables    | 11     | Explain how quantitative variables were handled in the analyses. If applicable, describe which groupings were chosen and why                                                                                                                                                                                                                                                                                                                                           | 5                  |
| Statistical methods       | 12     | (a) Describe all statistical methods, including those used to control for confounding                                                                                                                                                                                                                                                                                                                                                                                  | 5                  |
|                           |        | (b) Describe any methods used to examine subgroups and interactions                                                                                                                                                                                                                                                                                                                                                                                                    | 5                  |
|                           |        | (c) Explain how missing data were addressed                                                                                                                                                                                                                                                                                                                                                                                                                            | -                  |
|                           |        | (d) <i>Cohort study</i> —If applicable, explain how loss to follow-up was addressed<br><i>Case-control study</i> —If applicable, explain how matching of cases and controls was addressed                                                                                                                                                                                                                                                                              | -                  |

|                          |     |                                                                                                                                                                                                                                                                                                                                                                                                               |               |
|--------------------------|-----|---------------------------------------------------------------------------------------------------------------------------------------------------------------------------------------------------------------------------------------------------------------------------------------------------------------------------------------------------------------------------------------------------------------|---------------|
|                          |     | <i>Cross-sectional study</i> —If applicable, describe analytical methods taking account of sampling strategy                                                                                                                                                                                                                                                                                                  |               |
|                          |     | (e) Describe any sensitivity analyses                                                                                                                                                                                                                                                                                                                                                                         |               |
| <b>Results</b>           |     |                                                                                                                                                                                                                                                                                                                                                                                                               |               |
| Participants             | 13* | (a) Report numbers of individuals at each stage of study—eg numbers potentially eligible, examined for eligibility, confirmed eligible, included in the study, completing follow-up, and analysed<br>(b) Give reasons for non-participation at each stage<br>(c) Consider use of a flow diagram                                                                                                               | 6             |
| Descriptive data         | 14* | (a) Give characteristics of study participants (eg demographic, clinical, social) and information on exposures and potential confounders<br>(b) Indicate number of participants with missing data for each variable of interest<br>(c) <i>Cohort study</i> —Summarise follow-up time (eg, average and total amount)                                                                                           | 5-6<br>-<br>- |
| Outcome data             | 15* | <i>Cohort study</i> —Report numbers of outcome events or summary measures over time<br><i>Case-control study</i> —Report numbers in each exposure category, or summary measures of exposure<br><i>Cross-sectional study</i> —Report numbers of outcome events or summary measures                                                                                                                             | -<br>-<br>-   |
| Main results             | 16  | (a) Give unadjusted estimates and, if applicable, confounder-adjusted estimates and their precision (eg, 95% confidence interval). Make clear which confounders were adjusted for and why they were included<br>(b) Report category boundaries when continuous variables were categorized<br>(c) If relevant, consider translating estimates of relative risk into absolute risk for a meaningful time period | -<br>-<br>-   |
| Other analyses           | 17  | Report other analyses done—eg analyses of subgroups and interactions, and sensitivity analyses                                                                                                                                                                                                                                                                                                                |               |
| <b>Discussion</b>        |     |                                                                                                                                                                                                                                                                                                                                                                                                               |               |
| Key results              | 18  | Summarise key results with reference to study objectives                                                                                                                                                                                                                                                                                                                                                      | 7             |
| Limitations              | 19  | Discuss limitations of the study, taking into account sources of potential bias or imprecision. Discuss both direction and magnitude of any potential bias                                                                                                                                                                                                                                                    | -             |
| Interpretation           | 20  | Give a cautious overall interpretation of results considering objectives, limitations, multiplicity of analyses, results from similar studies, and other relevant evidence                                                                                                                                                                                                                                    | 7-8-9         |
| Generalisability         | 21  | Discuss the generalisability (external validity) of the study results                                                                                                                                                                                                                                                                                                                                         | 9-10          |
| <b>Other information</b> |     |                                                                                                                                                                                                                                                                                                                                                                                                               |               |
| Funding                  | 22  | Give the source of funding and the role of the funders for the present study and, if applicable, for the original study on which the present article is based                                                                                                                                                                                                                                                 | 1             |

\*Give information separately for cases and controls in case-control studies and, if applicable, for exposed and unexposed groups in cohort and cross-sectional studies.

**Note:** An Explanation and Elaboration article discusses each checklist item and gives methodological background and published examples of transparent reporting. The STROBE checklist is best used in conjunction with this article (freely available on the Web sites of PLoS Medicine at <http://www.plosmedicine.org/>, Annals of Internal Medicine at <http://www.annals.org/>, and Epidemiology at <http://www.epidem.com/>). Information on the STROBE Initiative is available at [www.strobe-statement.org](http://www.strobe-statement.org).
